1

Article

2

3 **Contrasted gene decay in subterranean vertebrates: insights from**  
4 **cavefishes and fossorial mammals**

5

6 Maxime Policarpo<sup>1</sup>, Julien Fumey<sup>‡,1</sup>, Philippe Lafargeas<sup>1</sup>, Delphine Naquin<sup>2</sup>, Claude  
7 Thermes<sup>2</sup>, Magali Naville<sup>3</sup>, Corentin Dechaud<sup>3</sup>, Jean-Nicolas Volff<sup>3</sup>, Cedric Cabau<sup>4</sup>,  
8 Christophe Klopp<sup>5</sup>, Peter Rask Møller<sup>6</sup>, Louis Bernatchez<sup>7</sup>, Erik García-Machado<sup>7,8</sup>, Sylvie  
9 Rétaux<sup>\*,9</sup> and Didier Casane<sup>\*,1,10</sup>

10

11 <sup>1</sup> Université Paris-Saclay, CNRS, IRD, UMR Évolution, Génomes, Comportement et  
12 Écologie, 91198, Gif-sur-Yvette, France.

13 <sup>2</sup> Institute for Integrative Biology of the Cell, UMR9198, FRC3115, CEA, CNRS, Université  
14 Paris-Sud, 91198 Gif-sur-Yvette, France.

15 <sup>3</sup> Institut de Génomique Fonctionnelle de Lyon, Univ Lyon, CNRS UMR 5242, Ecole  
16 Normale Supérieure de Lyon, Université Claude Bernard Lyon 1, Lyon, France.

17 <sup>4</sup> SIGENAE, GenPhySE, Université de Toulouse, INRAE, ENVT, F-31326, Castanet Tolosan,  
18 France.

19 <sup>5</sup> INRAE, SIGENAE, MIAT UR875, F-31326, Castanet Tolosan, France.

20 <sup>6</sup> Natural History Museum of Denmark, University of Copenhagen, Universitetsparken 15,  
21 DK-2100 Copenhagen Ø, Denmark.

22 <sup>7</sup> Department of Biology, Institut de Biologie Intégrative et des Systèmes, Université Laval,  
23 1030 Avenue de la Médecine, Québec City, Québec G1V 0A6, Canada.

24 <sup>8</sup> Centro de Investigaciones Marinas, Universidad de La Habana, Calle 16, No. 114 entre 1ra e  
25 3ra, Miramar, Playa, La Habana 11300, Cuba.

26 <sup>9</sup> Université Paris-Saclay, CNRS, Institut des Neurosciences Paris-Saclay, 91190, Gif-sur-  
27 Yvette, France.

28 <sup>10</sup> Université de Paris, UFR Sciences du Vivant, F-75013 Paris, France.

29

30

31 <sup>‡</sup> Present address: Human Genetics and Cognitive Functions, Institut Pasteur, CNRS UMR  
32 3571, Université de Paris, Paris 15

33

34 \* Corresponding authors: E-mails: [sylvie.retaux@inaf.cnrs-gif.fr](mailto:sylvie.retaux@inaf.cnrs-gif.fr); [didier.casane@egce.cnrs-gif.fr](mailto:didier.casane@egce.cnrs-gif.fr).

35

36

37 **Abstract (241 words; max = 250)**

38

39 Evolution sometimes proceeds by loss, especially when structures and genes become  
40 dispensable after an environmental shift relaxing functional constraints. Gene decay can serve  
41 as a read-out of this evolutionary process. Animals living in the dark are outstanding models,  
42 in particular cavefishes as hundreds of species evolved independently during very different  
43 periods of time in absence of light. Here, we sought to understand some general principals on  
44 the extent and tempo of decay of several gene sets in cavefishes. The analysis of the genomes  
45 of two Cuban species belonging to the genus *Lucifuga* provides evidence for the most massive  
46 loss of eye genes reported so far in cavefishes. Comparisons with a recently-evolved cave  
47 population of *Astyanax mexicanus* and three species belonging to the tetraploid Chinese genus  
48 *Sinocyclocheilus* revealed the combined effects of the level of eye regression, time and  
49 genome ploidy on the number of eye pseudogenes. In sharp contrast, most circadian clock and  
50 pigmentation genes appeared under strong selection. In cavefishes for which complete  
51 genomes are available, the limited extent of eye gene decay and the very small number of loss  
52 of function (LoF) mutations per pseudogene suggest that eye degeneration is never very  
53 ancient, ranging from early to late Pleistocene. This is in sharp contrast with the identification  
54 of several eye pseudogenes carrying many LoF mutations in ancient fossorial mammals. Our  
55 analyses support the hypothesis that blind fishes cannot thrive more than a few millions of  
56 years in cave ecosystems.

57

58 **Key words:** cavefishes, eye genes, pseudogenization, machine learning, relaxed selection,  
59 molecular dating.

60

61

62 **Introduction (791 words)**

63

64 The evolution of organisms confronted to drastic environmental shifts results in sometimes  
65 profound phenotypic changes. Constructive evolution involved in adaptation to new  
66 environments, and relying on novelties at phenotypic and genetic levels, has drawn much  
67 interest. Nevertheless, it becomes evident that regressive evolution, which is often non  
68 adaptive and which occurs by loss of structures and functions and corresponding genes,  
69 accounts for a non-negligible part of the evolutionary process (Lahti, et al. 2009; Albalat and  
70 Cañestro 2016). Here, we sought to better understand the modalities, extent, tempo and limits  
71 of molecular decay of several light-related genetic systems in subterranean vertebrates. It has  
72 been shown that several independent lineages of obligate fossorial mammals with degenerated  
73 eyes have lost many genes involved in visual perception (Kim, et al. 2011; Emerling and  
74 Springer 2014; Fang, Nevo, et al. 2014; Fang, Seim, et al. 2014; Emerling 2018). Cave  
75 vertebrates which are essentially cavefishes are other outstanding models to tackle these  
76 issues (Culver and Pipan 2009). However, the molecular decay of genes has not been  
77 surveyed at a genome-wide scale in relevant cavefish species. On the one hand, in the  
78 reference genome of *A. mexicanus* cavefish, no or only a couple of pseudogenes have been  
79 found among sets of genes which are eye specific, involved in the circadian clock, or else  
80 related to pigmentation (Protas, et al. 2006; Beale, et al. 2013; McGaugh, et al. 2014). Such  
81 maintenance of a very high proportion of functional genes most likely results from a very  
82 recent origin, no earlier than in the late Pleistocene, of cave populations (Fumey, et al. 2018).  
83 On the other hand, in the genomes of three fishes belonging to the genus *Sinocyclocheilus* (*S.*  
84 *grahami* which is a surface fish with large eyes, *S. anshuiensis* which is a blind cavefish and  
85 *S. rhinoceros* which is a small-eyed cavefish) many LoF mutations were found (Yang, et al.  
86 2016), but their tetraploid genomes hampered the identification of those mutations that fixed

87 in relation to the surface to cave shift. Indeed, after a whole-genome duplication (WGD), the  
88 pair of paralogs resulting from this process (ohnologs) are most often redundant and one of  
89 them can be pseudogenized without reducing fitness. Accordingly, *S. grahami* carries eye  
90 pseudogenes like the eyeless *S. anshuiensis* and the small-eyed *S. rhinocerosus*, but no thorough  
91 analysis of differential gene losses in relation to the level of eye degeneration has been  
92 performed (Yang, et al. 2016).

93 In order to examine the long term effect of life in caves on the molecular decay of large sets  
94 of genes involved in various light-dependent biological processes, genomes of fishes evolving  
95 in caves for a very long time and which did not undergo a recent WGD are required. Two  
96 clades of cavefishes (cave brotulas from Bahamas and Cuba) were previously identified in the  
97 genus *Lucifuga*, one comprising only blind cavefish species and the other only small-eyed  
98 cavefish species (García-Machado, et al. 2011). As no close surface relative has been  
99 identified up to now and large genetic distances were found between some species, within and  
100 between clades, this genus of cavefishes is likely relatively ancient, and the last common  
101 ancestor of extant species was probably a cave-adapted fish. We sequenced the genomes of  
102 two Cuban cave brotulas: one specimen, belonging to *L. dentata*, was blind and depigmented,  
103 the other one, belonging to *L. gibarensis*, had small eyes and was pigmented. The latter  
104 species is a new species first identified as *Lucifuga* sp. 4 (García-Machado, et al. 2011) that  
105 will be formally named and described in a forthcoming publication.

106 We searched for likely LoF mutations (*i.e.* STOP codon gains, losses of START and STOP  
107 codons, losses of intron splice sites and small indels leading to frameshifts) and for several  
108 signatures of relaxed selection on nonsynonymous mutations in genes: 1) uniquely expressed  
109 in the eyes or coding for non-visual opsins, 2) involved in the circadian clock, 3) involved in  
110 pigmentation. The contrasted patterns of pseudogenization found for the three categories of  
111 genes indicate that eye genes are much less constrained than circadian clock and pigmentation

112 genes in caves. In *A. mexicanus* cavefish, despite only one eye gene carrying a LoF mutation  
113 was found, using machine learning-based estimations of the deleterious impact of  
114 nonsynonymous mutations implemented in MutPred2 (Pejaver, et al. 2017), we obtained  
115 evidence that most if not all eye genes are under relaxed selection, but for a too short period  
116 of time to allow the fixation of more than a few LoF mutations. In other cavefishes, more eye  
117 pseudogenes were found and the level of gene decay depended on several factors such as the  
118 time fishes have spent in the subterranean environment, their level of troglomorphy and the  
119 level of ploidy of their genomes. Nevertheless, no eye genes with many LoF mutations were  
120 found, in sharp contrast to highly degenerated eye genes identified in some fossorial  
121 mammals, suggesting that eye degeneration in cavefishes is much more recent.

122

## 123 **Results**

124

### 125 **Assembly of the draft genomes of two Cuban cave brotulas**

126

127 First, the genome of a specimen of *Lucifuga dentata* (Bythitidae, Ophidiiformes) was  
128 sequenced (see a photo in **supplementary fig. S1, Supplementary Material** online).  
129 Assembly resulted in 52,944 scaffolds whose size sum up to 634 Mb, N50 = 119.6 kb (for  
130 scaffold size distribution, see **supplementary fig. S2, Supplementary Material** online). This  
131 genome size is consistent with those of three other genomes available (Malmstrøm, et al.  
132 2017) and estimations of the genome size of other Ophidiiformes (Gregory 2019). To assess  
133 the quality of the assembly, raw sequences were realigned to the assembly: 95% of the reads  
134 realigned correctly resulting in a mean coverage of 134x. Then, the completeness of the  
135 assembly was assessed using BUSCO with the Actinopterygii gene database (Kriventseva, et  
136 al. 2015). Among 4,584 genes, 4,249 (92.7%) were found complete, 194 (4.2%) were

137 incomplete and 141 (3.1%) were missing. Using BUSCO with three other Ophidiiformes  
138 genomes currently available (*Brotula barbata*, *Carapus acus* and *Lamprogrammus exutus*),  
139 the genome of *Lucifuga dentata* appeared as the most complete (see **supplementary fig. S3**,  
140 **Supplementary Material** online). Then, the genome of a specimen belonging to the small-  
141 eyed *Lucifuga gibarensis* was sequenced (see a photo in **supplementary fig. S1**,  
142 **Supplementary Material** online). As nuclear DNA sequence divergence is about 1%  
143 between the two *Lucifuga* species, short reads of *L. gibarensis* were mapped on *L. dentata*  
144 genome. The mean coverage was 84x, with 86% of the reads mapping on the genome.  
145 Heterozygosity was estimated on raw Illumina reads using GenomeScope (Vurture, et al.  
146 2017). The heterozygosity of *L. dentata* (0.1%) was lower than that of *L. gibarensis* (0.26%).

147

#### 148 **Assembly of a transcriptome of *L. dentata* and genome annotation**

149

150 Based on mRNA extracted from the gonads, gills, heart and brain of *L. dentata*, a *de novo*  
151 transcriptome assembly was obtained using Trinity (Grabherr, et al. 2011). Quality and  
152 completeness assessment of this transcriptome were performed following Trinity guide.  
153 Among 4,584 genes corresponding to the Actinopterygii gene database of BUSCO, 82.8%  
154 were found complete (**supplementary fig. S3, Supplementary Material** online) and 92.31 %  
155 of the reads were mapped back to the assembly with 84 % as proper pairs, which indicate an  
156 overall good quality transcriptome. More on quality check can be found in **supplementary**  
157 **fig. S4, Supplementary Material** online.

158 A combination of *de novo* predictions, RNA-seq evidence and protein alignments was used to  
159 annotate the genome of *L. dentata* (see workflow in **supplementary fig. S5, Supplementary**  
160 **Material** online). This resulted in 30,001 gene models with an average gene length of 9,693  
161 bp and an average protein length of 435 amino acids. Among predicted genes, 23,524 had a

162 functional annotation with BLAST to the SwissProt/UniProt database and 21,558 genes were  
163 detected with a functional domain by Interproscan. Annotation completeness was assessed  
164 using BUSCO in protein mode; among 4,584 corresponding to the Actinopterygii gene  
165 database of BUSCO, 87.4% were found complete, 6.5% incomplete and 6% missing  
166 (**supplementary fig. S3, Supplementary Material** online). A homemade pipeline was used  
167 to describe the repeat landscape of the genome of *L. dentata*. We found 16.3% of repeated  
168 elements, among which 2.4% of LINEs and 0.4% of SINEs (**supplementary fig. S6,**  
169 **Supplementary Material** online).

170

### 171 **Delimitation and retrieving of eye, circadian clock and pigmentation genes**

172

173 In zebrafish, *Danio rerio*, we identified 95 genes expressed only in the eyes or coding non-  
174 visual opsins expressed in other organs (**fig. 1A, supplementary fig. S7 and Data Supp 1,**  
175 **Supplementary Material** online, and see Methods). In addition, we retrieved a list of 42  
176 circadian clock genes (Li, et al. 2013) and 257 genes involved in pigmentation (Lorin, et al.  
177 2018) (**fig. 1B and fig. 1C, supplementary Data\_Supp1, Supplementary Material** online).  
178 Using the program exonerate, homologs were retrieved from other fish genomes, that is five  
179 cavefishes (*A. mexicanus* from Pachón cave, *L. dentata* and *L. gibarensis*, *S. anshuiensis* and  
180 *S. rhinoceros*), close surface relatives (*A. mexicanus* and *Pygocentrus nattereri*, *Brotula*  
181 *barbata*, *Carapus acus* and *Lamprogrammus exutus*, *S. grahami* and *C. carpio*) and a  
182 distantly-related outgroup (*Lepisosteus oculatus*). Their phylogenetic relationships are shown  
183 in **fig. 2**. Noteworthy, some genes have been duplicated in the terminal lineage leading to  
184 zebrafish (used as a reference to establish the gene lists) and thus only one copy was expected  
185 to be found in other fishes. On the other hand, gene duplications, gene deletions as well as

186 WGDs occurred in other lineages. Therefore, the number of genes retrieved is highly variable  
187 among genomes (**fig. 3**).

188

### 189 Identification of LoF mutations

190

191 Genes sequences were classified as functional if found complete with no LoF mutation, as  
192 pseudogene if complete and carrying at least one LoF mutation, and as truncated if incomplete  
193 (the sequences can be found in **supplementary Data\_Supp2, Supplementary Material**  
194 online). Only the following LoF mutations were analyzed: gain of an internal STOP codon,  
195 loss of the initiation codon, loss of the STOP codon, indel leading to a frameshift, mutations  
196 at intron donor and acceptor sites. In the present study, incomplete genes were discarded as it  
197 was difficult to know if they corresponded to sequencing gaps, assembly artefacts or true  
198 large deletions. Using PCR to amplify missing exons, we estimated that 85% of the large  
199 deletions in the *A. mexicanus* cavefish genome are artefacts (data not shown) - although some  
200 large deletions such as in the gene *Oca2* (a pigmentation gene) are real (Protas, et al. 2006).  
201 Other mutations in non-coding and coding sequences that could lead to a non-functional gene  
202 were not searched for as they cannot be readily identified. For example, several in-frame indel  
203 mutations were found in *A. mexicanus* but their functional consequences remained elusive  
204 (Berning, et al. 2019). The numbers of pseudogenes reported hereafter are thus underestimates  
205 of the true numbers of non-functional genes, but they nevertheless allowed comparative  
206 analyses.

207

208 Eye pseudogenes: among the list of 95 zebrafish eye genes, 76 genes were retrieved from  
209 *Lucifuga* genomes, 75 from *B. barbata*, 72 from *C. acus* and 73 from *L. exutus* (**fig. 3**,  
210 **Supplementary fig. S7 and Data\_Supp1, Supplementary Material** online). Interestingly,



211 all these ophidiiforms seem to have lost long-wave sensitive (LWS) opsins. This loss is most  
212 likely due to a gene deletion in their common ancestor living in deep ocean (**supplementary**  
213 **fig. S8, Supplementary Material** online), in accordance with a report on the reduction of the  
214 number of LWS genes in fishes living below 50 m (Lin, et al. 2017). While no eye  
215 pseudogene was found in *B. barbata* or *C. acus* and only one in *L. exutus* (*gcap1*), 5  
216 pseudogenes were identified in *L. gibarensis* and 19 pseudogenes in *L. dentata*. The non-  
217 visual opsin *rgr1* was pseudogenized in the common ancestor of the two *Lucifuga* species, as  
218 the same mutation (at a splice site of intron 4) was found in both genomes (**fig. 3** and  
219 **supplementary Data\_Supp2, Supplementary Material** online). Examination of the read  
220 coverage of LoF mutations indicated that the specimen of *L. gibarensis* sequenced was  
221 heterozygous for LoF mutations found at two different sites in the *gcap2* gene  
222 (**supplementary table S1, Supplementary Material** online). In the transcriptome of *L.*  
223 *dentata*, transcripts corresponding to 9 pseudogenes were found (3 non-visual opsins, 3  
224 crystallins and 3 genes involved in the phototransduction pathway), while no transcripts were  
225 found for 10 other pseudogenes (**supplementary table S1, Supplementary Material** online).  
226 In those transcripts, all the LoF mutations identified at the genome level were present.  
227 In agreement with a recent WGD, two copies (ohnologs) of most eye genes were retrieved  
228 from the genomes of *Sinocyclocheilus* species (**fig. 3, supplementary fig. S7,**  
229 **Supplementary Material** online). In the large-eyed *S. grahami*, about 10% of retrieved eye  
230 genes were pseudogenized (18 / 173 genes carried at least a LoF mutation), to be compared to  
231 19% (32 / 169) in the small-eyed *S. rhinoceros* and 28% (48 / 171) in the eyeless cavefish *S.*  
232 *anshuiensis*. Only one pair of ohnologs were concomitantly pseudogenized in the eyed *S.*  
233 *grahami* and the small-eyed *S. rhinoceros*, while seven pairs of ohnologs were  
234 concomitantly pseudogenized in the blind *S. anshuiensis* (**fig.1, fig.3, supplementary fig. S7,**  
235 **Data\_Supp1, Supplementary Material** online). A STOP codon and a frameshift in *sws1*

236 were shared by the three *Sinocyclocheilus* species and *Cyprinus carpio*. A new STOP codon  
237 and a new frameshift in this gene were shared by *Sinocyclocheilus* species, as well as a  
238 mutation at the donor site of the third intron of *gc3*; *S. anshuiensis* and *S. grahami* shared a  
239 frameshift in *crygm5* and a frameshift and a new STOP codon in *grk7b* (**fig. 3**).

240 In *A. mexicanus*, 86 genes were retrieved from the surface fish genome while 85 were  
241 retrieved from the genome of the Pachón cavefish. Only one pseudogene was found in the  
242 Pachón cavefish genome, which is due to a deletion of 11 bp in *pde6b* (**fig. 1** and **fig. 3**). The  
243 examination of the automatic annotation of the gene allowed the identification of an erroneous  
244 1 bp intron (ENSAMXG00000000290, Ensembl 91), restoring the coding frame. Noteworthy,  
245 we also confirmed using PCR that two large deletions occurred in the Pachón cavefish, one  
246 removing *opn8b* and the last 3 exons of *opn8a*, the other eliminating 2 exons of *rgr2*.

247 However, these genes were not included in the list of pseudogenes, according to the restrictive  
248 definition of an identifiable pseudogene used in the present study.

249 In summary, while no or very few eye genes are pseudogenized in surface fishes and *A.*  
250 *mexicanus* cavefish, more eye pseudogenes were found in other cavefishes, up to 25% in *L.*  
251 *dentata*.

252

253 Circadian clock pseudogenes: based on a literature survey, 42 genes involved in the circadian  
254 clock in *Danio rerio* were identified (Li, et al. 2013) and retrieved from other fish genomes.

255 On the one hand, no pseudogene was found among 36 genes retrieved from *Lucifuga* genomes  
256 and 38 genes identified from *Astyanax* genomes. On the other hand, 5, 15 and 9 pseudogenes  
257 were identified among 80, 83 and 81 genes retrieved from the genomes of *S. grahami* (eyed),  
258 *S. rhinoceros* (small-eyed) and *S. anshuiensis* (blind), respectively. Both ohnologs of *cry-*  
259 *dash* were independently pseudogenized in *S. rhinoceros* and *S. anshuiensis*, a gene also  
260 pseudogenized in the Somalian cavefish *P. andruzzii*, Three other pair of ohnologs (*cry1b*,

261 *cry2a* and *per2*) carried LoF mutations in *S. rhinoceros*, *per2* being also non-functional in *P.*  
262 *andruzzii*. These data suggest that the circadian clock has most likely been lost in *S.*  
263 *rhinoceros* whereas this loss is less strongly supported in the case of *S. anshuiensis* (**fig. 1**  
264 and **fig. 3**).

265

266 Pigmentation genes: based on a literature survey, 257 genes involved in pigmentation in  
267 *Danio rerio* were identified (Lorin, et al. 2018) and retrieved from other fish genomes. Very  
268 few pseudogenes were found among 237 pigmentation genes in *Lucifuga* genomes, that is 8  
269 LoF mutations in *L. dentata* and 7 in *L. gibarensis*. While *smtla* and *myo7ab* seem to have  
270 been lost independently in the two lineages, a STOP codon and an insertion is shared in  
271 *adamts20*. The number of pseudogenes in these cavefishes does not seem to depart from those  
272 found in some surface relatives, as 6 pseudogenes were identified among 230 pigmentation  
273 genes in *Lamprogrammus exutus* (**supplementary Data\_Supp1, Supplementary Material**  
274 **online**). Among *Sinocyclocheilus* species, only 3% (15/484) of pseudogenes were found in *S.*  
275 *grahami* while 6% (28/490) were found in *S. rhinoceros* and 7% (35/487) in *S. anshuiensis*  
276 (**fig. 3**). Thus, after the WGD, the retention of pigmentation genes seems to have been much  
277 higher than among eye genes in the two cavefishes but also in the surface fish (compare to  
278 10%, 19% and 28% of eye pseudogenes, respectively). Such high percentage of retention of  
279 pigmentation genes has been found also after the Salmonid-specific WGD (Lorin, et al. 2018).  
280 Strikingly, while no pair of ohnologs was found pseudogenized in *S. grahami*, the same two  
281 pairs of ohnologs (*gch2* and *pmelb*) were independently pseudogenized in *S. anshuiensis* and  
282 *S. rhinoceros*. The very small number of pseudogenes and the independent pseudogenization  
283 of the same genes in these two species suggest that only a limited subset of genes involved in  
284 pigmentation can be lost in these cavefishes.

285 In *A. mexicanus*, 2 pseudogenes were found among 249 pigmentation genes: *mc1r* which has  
286 already been reported in the literature (Gross, et al. 2009) and which is also pseudogenized in  
287 the Chinese cavefish *Oreonectes daqikongensis* (Liu, et al. 2019), and *tyrp1a* that is mis-  
288 annotated in ensembl (ENSAMXG00000021619, Ensembl 91).

289

## 290 Types of LOF mutations and their distribution along pseudogenes

291

292 A total of 118 mutations to a STOP codon, 148 frameshifts (84 deletions and 64 insertions), 5  
293 STOP codon losses, 13 START codon losses and 40 intron splice site losses were identified in  
294 our dataset (**fig. 4**) (see **supplementary Data\_Supp1, Supplementary Material** online for a  
295 detailed description of the number of LoF mutations in each gene set). Most frameshifts were  
296 the results of very small deletions or insertions (1 or 2 bp) while a few of them were indels  
297 involving a larger number of nucleotides (**fig. 4C, supplementary fig. S10, Supplementary**  
298 **Material** online). The largest deletion was 83 bp long in *zic2b* (pigmentation gene) of *S.*  
299 *rhinoceros* and the largest insertion was 20 bp long in *opn7b* (eye gene) of *S. anshuiensis*. In  
300 order to test if LoF mutations were distributed randomly along the genes, that is they were not  
301 clustered at the 3' end of the genes where their deleterious effect could be low, we computed  
302 the effective segment size generated by LoF mutations and compared this value with  
303 simulations of random distributions of mutations along genes. We found that premature STOP  
304 codons and frameshifts are distributed randomly along coding sequences (for more details, see  
305 **Materials and Methods and supplementary fig. S9, Supplementary Material** online).  
306 We next tested if the relative frequencies of the different types of LoF mutations (*i.e.* STOP  
307 codon gains, losses of START and STOP codons, losses of intron splice sites and small indels  
308 leading to frameshifts) were those expected under the neutral model, that is if their relative  
309 frequencies were proportional to their probabilities of occurrence. Taking into account a

310 nucleotide mutation rate ( $\mu$ ), observed transition/transversion ratio and codon frequencies, the  
311 rate of mutation to a new STOP codon was  $\mu_{\text{stop}} = 0.036\mu$ . Based on the ratio of  
312 frameshift/STOP mutations, we estimated the rate of indels leading to frameshifts ( $\mu_{\text{frameshift}}$ )  
313 as  $148/118 \times \mu_{\text{stop}} = 0.05\mu$ . The rate of mutations in splice acceptor or donor sites was  
314 estimated as:  $4 \times (\text{number of introns}) / \Sigma (\text{CDS length}) \times \mu$ , *i.e.*  $4 \times 34175 / 6154965 \times \mu =$   
315  $0.022\mu$  (where 34175 is the number of introns and 6154965 is the number of bases identified  
316 in the 3625 genes retrieved from the genomes of two *Lucifuga* species, three *Sinocyclocheilus*  
317 species and two genomes of *Astyanax mexicanus*). The rate of START codon loss was  
318 estimated as:  $3 \times (\text{number of genes}) / \Sigma (\text{CDS length}) \times \mu$ , *i.e.*  $3 \times 3625 / 6154965 \times \mu =$   
319  $0.0018\mu$ . The rate of STOP codon loss was estimated as:  $3 \times (\text{number of genes}) / \Sigma (\text{CDS}$   
320  $\text{length}) \times 0.85 \times \mu$ , *i.e.*  $3 \times 3625 / 6154965 \times 0.85 \times \mu = 0.0015\mu$  (where 0.85 is the probability  
321 that a mutation in a STOP codon leads to a sense codon). The observed distribution of LoF  
322 mutations fitted well with those expected, either taking the three datasets together (**fig. 4B,**  
323 **supplementary fig. S11 and Data\_Supp1, Supplementary Material** online) or each dataset  
324 individually. It was similar to the distribution found in eye pseudogenes of subterranean  
325 mammals (**supplementary fig. S11 and supplementary Data\_Supp1, Supplementary**  
326 **Material** online). These results suggested that the number LoF mutations of each type is  
327 proportional to its probability of occurrence.

328

329 [Estimation of the number of effectively neutral eye genes based on the](#)  
330 [distribution of LoF mutations per pseudogene in cave brotulas](#)

331

332 Among pseudogenes, some accumulated more than one LoF mutation, but in most of the  
333 cases only one LoF mutation was found (**supplementary fig. S7 and Data\_Supp1,**

334 **Supplementary Material** online). In order to test if the whole set, or only a subset, of eye  
335 genes is free to accumulate LoF mutations, we compared the distribution of the number of  
336 LoF mutations per pseudogene with those expected under these different hypotheses.  
337 Expected distributions were obtained using either a simple analytical model assuming that all  
338 genes have the same probability to fix a LoF mutation, or a more complex model that takes  
339 into account that different genes do not have the same probability to fix a LoF mutation  
340 because they have different length and they do not contain the same number of introns. In the  
341 latter case, the computation of expected distribution was based on simulations. Very similar  
342 expected distributions were obtained with both approaches. This analysis could be performed  
343 only with *Lucifuga* species, as only one LoF mutation was found in *Astyanax mexicanus* and a  
344 WGD allowed LoF mutations to reach fixation in a *Sinocyclocheilus* species with large  
345 functional eyes such as *S. grahami*.

346 In *L. dentata*, 22 LoF mutations were distributed among 19 eye pseudogenes. More precisely,  
347 among the 76 genes retrieved, there were 57 genes without LoF mutation, 16 with 1 mutation,  
348 and 3 with 2 mutations (**fig. 3** and **supplementary fig. S7, Supplementary Material** online).  
349 This distribution was compared with expected distributions obtained for different numbers of  
350 neutral genes ranging from 19 to 76 (**fig. 5A**). The best fit between the observed and expected  
351 distribution was found when at least 60 genes are evolving as neutral sequences (**fig. 5A**).

352 Using the same approach, in *L. gibarensis*, we analysed the observed distribution of the  
353 number of LoF mutations per pseudogene (71 genes without LoF mutation, 3 with 1 mutation,  
354 2 with 2 mutations), considering a number of neutral genes within a range of 5 to 76 (**fig. 5B**  
355 and **supplementary fig. S7, Supplementary Material** online). In this case, the best fit was  
356 obtained when about 15 eye genes are free to accumulate LoF mutations (**fig. 5B**). These  
357 results suggested that most genes, if not all, are dispensable in the blind *L. dentata* whereas  
358 only a small subset can be lost in the small-eyed *L. gibarensis*.

359

360 Evidence of relaxed selection on non-synonymous mutations in cavefish eye  
361 genes

362

363 To reinforce the evidence brought by the above analyses on LoF mutations, we looked for  
364 other signatures of relaxed selection using methods based on changes in  $\omega$  (the ratio of the  
365 mean number of nonsynonymous substitutions per nonsynonymous site to the mean number  
366 of synonymous substitutions per synonymous site, also known as dn/ds). It is expected to be  
367 lower than one under purifying selection, equal to one under neutral evolution, and larger than  
368 one under adaptive selection. As gene divergence between *Lucifuga dentata* and *Lucifuga*  
369 *gibarensis* was lower than 0.9% and lower than 0.2% between the two *Astyanax mexicanus*  
370 morphs (for more details, see **supplementary folder divergence\_values, Supplementary**  
371 **Material** online), the number of nucleotide differences per gene was very low and often no  
372 sequence change was observed between a cave species (or population) and the closest surface  
373 species (or population) (**supplementary fig. S12, Supplementary Material** online).

374 Therefore, we used three sets of concatenated gene sequences (eye, circadian clock and  
375 pigmentation genes) to compute  $\omega$ .

376 With the phylogenetic analysis using maximum likelihood (PAML) package Version 4.9h  
377 (Yang 2007), allowing a different  $\omega$  along each branch, *Lucifuga dentata* had the highest  $\omega$   
378 (0.409) for eye genes. For circadian clock genes, both *Astyanax mexicanus* cavefish and  
379 *Lucifuga dentata* had the highest  $\omega$  (0.29). For pigmentation genes,  $\omega$  was similar in cave and  
380 surface fishes (**fig. 6ABC, supplementary fig. S13, Supplementary Material** online).

381 Independently, we computed  $\omega$  for the same sets of genes in *Sinocyclocheilus* species. For  
382 each species, ohnologs were concatenated into two series of gene sequences. With eye genes,  
383  $\omega$  was higher in the blind *S. anshuiensis* (0.36) than in the small eyed *S. rhinoceros* (0.32)

384 and the eyed *S. grahami* (0.23). With circadian clock genes,  $\omega$  has higher in the blind *S.*  
385 *anshuiensis* (0.38) and the small eyed *S. rhinoceros* (0.37) than in the eyed *S. grahami*  
386 (0.25). With pigmentation genes  $\omega$  was higher in the small eyed *S. rhinoceros* (0.32) and the  
387 blind *S. anshuiensis* (0.29) than in the eyed *S. grahami* (0.25) (**supplementary fig. S13,**  
388 **Supplementary Material** online). Thus  $\omega$  was consistently higher in cavefishes than in  
389 surface fishes, the shift being larger for eye genes than for circadian and pigmentation genes.  
390 In order to further examine if the shift of  $\omega$  in some cavefishes for some sets of genes revealed  
391 a relaxed selection, we used another approach implemented in RELAX which computes the  
392 values and distribution of three  $\omega$  using a branch-site model, the convergence of the three  $\omega$   
393 towards one in a lineage being a signature of relaxed selection (Wertheim, et al. 2015). The  
394 magnitude of convergence depends on a parameter,  $k$ , which tends to zero as selection tends  
395 to complete relaxation. RELAX detected relaxed selection on *Lucifuga dentata* eye genes  
396 with an important shift toward  $\omega = 1$  ( $k = 0.2$ ), and this was also true in a lesser extent in *A.*  
397 *mexicanus* cavefish ( $k = 0.5$ ). For pigmentation genes, the largest shift was also observed in  
398 *Lucifuga dentata* ( $k = 0.48$ ). No shift of distribution was observed with cavefish circadian  
399 clock genes, suggesting that these genes are under strong purifying selection (**supplementary**  
400 **fig. S14, fig. S15 and fig. S16 Supplementary Material** online).  
401 Finally, with the aim of finding independent evidence of relaxed selection in cavefishes, in  
402 particular on *A. mexicanus* eye genes for which the number of mutations is low and thus the  
403 estimation of  $\omega$  was not accurate, a novel approach was developed. First, nonsynonymous  
404 mutations in different lineages were inferred using the aaml program from the PAML  
405 package. Then, the deleterious impact of these mutations, a score which ranges between 0 (not  
406 deleterious) and 1 (very deleterious), was estimated using a machine learning method  
407 implemented in MutPred2 (Pejaver, et al. 2017). The kernel density estimation (KDE) of the  
408 distributions of the scores in eye, circadian clock and pigmentation genes were obtained for



409 each terminal lineages leading to surface fishes and cavefishes, as well as for computer  
410 simulations of substitutions in the same sets of genes under a neutral model. Whatever the set  
411 of genes, in all surface fishes, the KDE was similarly right-skewed (**fig. 7ABC**), suggesting  
412 that most mutations which reached fixation have a low impact on the fitness. This was  
413 confirmed by the shape of the distribution of the scores in simulations of substitutions without  
414 selection (equivalent to the distribution before selection) which was very different to those of  
415 surface fishes, that is almost uniform and suggesting that the most deleterious mutations had  
416 been removed by selection in surface fishes. Before selection, the score distribution was  
417 slightly different for the different sets of genes, probably reflecting different selective  
418 constraints on the sequences belonging to these gene sets (**fig. 7ABC**, grey and black curves).  
419 Noteworthy, the Transitions/Transversions (Ts/Tv) ratio used in simulations of substitutions  
420 under a neutral model had no impact on the distribution of the scores (**supplementary fig.**  
421 **S19, Supplementary Material** online). In cavefishes, the score distribution was very  
422 variable, depending on the cavefish species and the set of genes (**fig. 7ABC**). In order to  
423 refine the analysis of the score distribution in cavefishes, admixtures of different proportions  
424 of substitutions picked up from two distributions, one under neutral evolution (from the  
425 simulations) and the other with selection (in the lineage leading to zebrafish) were also  
426 obtained to make comparisons with cavefish distributions. Pairwise comparisons of empirical  
427 cumulative distributions (ECDF) were performed using the nonparametric Kolmogorov-  
428 Smirnov (KS) test. The same approach was attempted using Grantham's distances (Grantham  
429 1974) instead of MutPred2 scores but the contrast between the distributions of the distances  
430 with and without selection was much less discriminant and not analyzed further  
431 (**supplementary fig. S18, Supplementary Material** online).

432 With eye genes, for *A. mexicanus* cavefish (red curve, **fig. 7**), the distribution was not  
433 statistically different from that expected if all substitutions were neutral in this lineage (KS

434 test,  $p = 0.2$ ; **supplementary fig. S17, Supplementary Material** online), yet the best fit was  
435 with a mixture distribution with 24% of substitutions from the distribution under selection  
436 (**supplementary fig. S20, Supplementary Material** online). For *L. dentata* (brown curve,  
437 **fig. 7**) and *L. gibarensis* (orange curve, **fig. 7**), distributions departed from the neutral  
438 distribution (KS test,  $p = 1.4 \times 10^{-5}$  and  $p = 4 \times 10^{-6}$  respectively) (**fig. 7A** and **supplementary**  
439 **fig. S17, Supplementary Material** online) and the best fit was obtained with respectively  
440 34% and 60% of the substitutions from the distribution under selection (**supplementary fig.**  
441 **S20, Supplementary Material** online). For all *Sinocyclocheilus* species, the score  
442 distribution was different from those of surface fishes, even for the eyed *S. grahami*, most  
443 likely because after the WGD purifying selection on nonsynonymous mutations was partially  
444 relaxed on one or both ohnologs, but the ECDF of *S. rhinoceros* and *S. anshuiensis* were  
445 more shifted toward the neutral distribution than the ECDF of *S. grahami*, suggesting that the  
446 two cavefishes experienced a more neutral regime than the surface fish (**supplementary fig.**  
447 **S21, Supplementary Material** online).

448 With circadian genes, no cavefish ECDF fitted with the expected distribution under neutral  
449 evolution (**fig. 7B**). However, the ECDF of *A. mexicanus* cavefish was different from those of  
450 surface fishes and the best fit was obtained with an admixture of 59% of the substitutions  
451 from the distribution under selection (**supplementary fig. S20, Supplementary Material**  
452 online). For *L. dentata* and *L. gibarensis*, the best fit involved respectively the admixture of  
453 69% and 93% of the substitutions from the distribution under selection (**fig. 7B**,  
454 **supplementary fig. S20, Supplementary Material** online). In accordance with the number  
455 of pseudogenes found in *S. rhinoceros* for this set of genes, its ECDF was the closest to the  
456 neutral distribution among the three *Sinocyclocheilus* species, with a best fit found with an  
457 admixture of 39% of substitutions from the distribution under selection (**supplementary fig.**  
458 **S21** and **fig. S22, Supplementary Material** online).

459 With pigmentation genes, no cavefish ECDF fitted with the expected distribution under  
460 neutral evolution (**fig. 7C**). All cavefish distributions were very similar to the surface fish  
461 distributions, in accordance with the hypothesis that very few genes belonging to this category  
462 can be lost, even after cave colonization and/or genome duplication (**see also supplementary**  
463 **fig. S17, fig. S20, fig. S21 and fig. S22, Supplementary Material** online).

464 In summary, the different approaches consistently suggested that different levels of relaxed  
465 selection on the set of eye genes are correlated with the levels of eye degeneration in  
466 cavefishes, whereas most circadian clock and pigmentation genes are under strong purifying  
467 in these species.

468

#### 469 Dating relaxation of purifying selection on eye genes in *L. dentata*

470

471 In order to conciliate results suggesting that most eye genes are dispensable and the finding  
472 that selection is not totally relaxed in the *L. dentata* lineage, we postulated two successive  
473 periods of evolution, one under selection followed by another under relaxed selection. Three  
474 independent approaches were used to estimate when selection was relaxed in this lineage.

475 First, we used the number of eye pseudogenes. With a simple analytical model assuming a  
476 LoF mutation rate equal to  $0.072 \times 10^{-8}$ , the highest probability of finding 19 pseudogenes  
477 among 76 neutral genes was obtained for relaxed selection starting 367,779 generations ago  
478 (probability > 5% in a range between 273,990 and 480,980 generations) (**fig. 8**, red curve).

479 Assuming that only 50 eye genes were free to accumulate LoF mutations, this time was  
480 pushed back to 611,132 [445,950 – 813,580] generations (**fig. 8**, pale red curve). Then,  
481 simulations were performed in order to take into account variations in the gene length and the  
482 number of introns per gene (**supplementary Data\_Supp1, Supplementary Material** online),  
483 codon usage, transition/transversion ratio ( $r = 4.57$ ) and effective population size ( $N_e$ ) in a

484 range between 100 and 1,000. These simulations and the analytical model gave very similar  
485 estimations, the effects of  $N_e$  and per gene LoF mutation rate variation being marginal (**fig. 8**,  
486 black, green and blue curves, only simulations assuming 76 neutral genes are shown).

487 Second, two dating methods were used (Li, et al. 1981; Meredith, et al. 2009), both based on  
488 the hypothesis of a shift of  $\omega$  from a low value to 1 after purifying selection was relaxed in a  
489 lineage. We assumed a divergence time of 80 My between *Lucifuga* and *Brotula*  
490 (<http://www.timetree.org/>). Eye genes of *Lucifuga* species and *Brotula barbata* were  
491 individually aligned and alignments concatenated. With one method (Li, et al. 1981), the  
492 divergence time between *Lucifuga dentata* and *Lucifuga gibarensis* was estimated equal to  
493 4,110,441 years ago and the time since non-functionalization of eyes genes in *L. dentata* equal  
494 to 1,486,042 years. With the other method (Meredith, et al. 2009),  $\omega$  was estimated equal to  
495 0.271 in the lineage leading to *L. gibarensis* and 0.502 in the lineage leading to *L. dentata*.  
496 Assigning these ratios respectively to functional branches and a mixed branch, the time since  
497 non-functionalization was estimated to 1,302,485 years.

498 Third, assuming that in the lineage leading to *L. dentata*, there is an admixture of 66% of the  
499 mutations that accumulated under relaxed selection and 34% under selection (**supplementary**  
500 **fig. S20, Supplementary Material** online), and that  $\omega = 0.27$  under selection (that is  $\omega$   
501 estimated in *L. gibarensis*, see **supplementary Data\_Supp3, Supplementary Material**  
502 online) and  $\omega = 1$  under relaxed selection, and the divergence between *L. dentata* and *L.*  
503 *gibarensis* occurred 4,110,441 years ago (estimated above), using the approach described in  
504 Materials and Methods, we obtained a congruent estimation of the age of selection relaxation,  
505 that is 1,413,991 years ago (**table 1, supplementary Data\_Supp3, Supplementary Material**  
506 online). Thus, the various methods to date relaxation of purifying selection in *L. dentata*  
507 lineage converge to approximately 1.5 My or 400.000 generations, estimations that would be  
508 consistent if we assume a generation time of about 4 years in *Lucifuga* cavefishes.

509

## 510 Distribution of LoF mutations in eye genes of cavefishes vs fossorial mammals

511

512 An extensive study of the regression of visual protein networks in three fossorial mammals,  
513 the Cape golden mole *Chrysochloris asiatica*, the naked mole-rats *Heterocephalus glaber* and  
514 the star-nosed mole *Condylura cristata*, has been published (Emerling and Springer 2014).

515 From this publication, we retrieved the number of pseudogenes, their names, and the number  
516 of LoF mutations per pseudogene in the three species (**fig. 9A**). In the Cape golden mole, 18  
517 pseudogenes were found among 63 eye genes, while only 11 pseudogenes were found in the  
518 naked-mole rat and 7 in the star-nosed mole. The distributions of LoF mutations per  
519 pseudogene in these mammals and those of two blind cavefishes (*L. dentata* and *S.*

520 *anshuensis*) were compared (**fig. 9B**). Many independent LoF mutations were found in the  
521 same eye genes in fossorial mammals and in cavefishes (**fig. 9A**). For each species, the  
522 distribution of the number of LoF mutations per pseudogene, either taking into account only  
523 shared pseudogenes between mammals and fishes or all the pseudogenes, were similar (**fig.**  
524 **9B**, main graph and inset respectively). However, the distribution was sharply contrasted  
525 between mammals and fishes. In fossorial mammals, most pseudogenes carried many LoF  
526 mutations, up to 28 mutations in two pseudogenes of the golden mole and 54 mutations in a  
527 single pseudogene of the star-nosed mole (**fig. 9, supplementary Data\_Supp1,**

528 **Supplementary Material** online). On the contrary, in fishes, very few LoF mutations were  
529 found in each pseudogene (**fig. 9, fig. S7, supplementary Data\_Supp1, Supplementary**  
530 **Material** online), the maximum being 5 LoF mutations in one pseudogene of *S. anshuensis*  
531 and 3 LoF mutations in a pseudogene of *L. dentata*. This comparison strongly supports the  
532 hypothesis that fossorial mammals have lived in the absence of light for a much longer time  
533 than cavefishes, but a smaller subset of genes has been under relaxed selection in mammals.

534

## 535 **Discussion**

536

537 When selection for maintaining a protein in a functional state is relaxed, theory predicts that  
538 LoF mutations in its coding and regulatory sequences can reach fixation by random genetic  
539 drift (Lynch and Conery 2000; Lahti, et al. 2009). In an isolated population, among a set of  
540 dispensable genes, the longer the time of neutral evolution, the higher the expected number of  
541 pseudogenes. Eventually, all the genes under relaxed selection will be pseudogenized. At the  
542 level of a single gene, the longer the time of neutral evolution, the higher the expected number  
543 of LoF mutations. Thus, after a very long period of time of neutral evolution, all the neutrally-  
544 evolving genes must carry many LoF mutations. The pace of this gene decay depends  
545 essentially on the pace of appearance of LoF mutations (Li and Nei 1977). In the present  
546 study, we focussed on a subset of LoF mutations that can be readily detected in genomes, that  
547 is mutations generating internal STOP codons, eliminating START or STOP codons,  
548 disrupting intron splice sites, and small insertions/deletions (indels) causing translation  
549 frameshifts. Although this approach inevitably leads to an underestimation of the number of  
550 non-functional genes, it allows comparative studies and molecular dating of selection  
551 relaxation in different species. Below, we discuss the patterns of pseudogenization in different  
552 sets of genes involved in vision, circadian clock and pigmentation during evolution in the dark  
553 of several cavefishes. We show how pseudogenization of eye genes in *Lucifuga dentata* shed  
554 new light on gene loss in relation to eye regression in cavefishes. On this basis, we refine  
555 previous analyses of other cavefish genomes. At a broader phylogenetic scale, we discuss the  
556 contrasted dynamic of pseudogenization in cavefishes and fossorial mammals.

557

## 558 **Putative impact of some LoF mutations**

559

560 Eye genes: in *L. dentata*, a frameshift was found in the alpha-crystallin, *cryaa*, whose  
561 downregulation in *A. mexicanus* cavefish plays a key role in triggering lens apoptosis (Ma, et  
562 al. 2014; Hinaux, et al. 2015). Another crystallin, *crybb1*, is pseudogenized in *L. dentata*.  
563 Mutations in this gene cause lens opacity in humans (Mackay, et al. 2002). We also found  
564 LoF mutations in two opsin receptor kinases, *grk7a* and *grk1b*. Mutations in these proteins  
565 can lead to overactive opsin and photoreceptor degeneration (Feng, et al. 2017). These two  
566 genes and *grk7b* have similar functions and are all expressed in cones. As these three kinases  
567 may have additive effect (Osawa and Weiss 2012), we can hypothesize that absence or  
568 malfunction of one of them could be compensated by the others. Such compensation could  
569 explain why we found that both *grk7b* orthologs carry LoF mutations in *S. grahami*, despite  
570 this fish has large eyes showing no evidence of degeneration. Another interesting gene is  
571 *gnb3b* which is pseudogenized in both *L. dentata* and *L. gibarensis* and which is linked to  
572 night-blindness in humans (Vincent, et al. 2016), yet *gnb3<sup>-/-</sup>* mice seem to have functional  
573 photoreceptors. Finally, we found LoF mutations in *gcap2*, a guanylate cyclase activator, in  
574 both *Lucifuga* species. This gene is associated to *retinitis pigmentosa* in humans (Sato, et al.  
575 2005) but it could be compensated by overexpression of *gcap1* in rods (Makino, et al. 2012).  
576 In *Astyanax mexicanus*, a deletion of 11 bp in the phosphodiesterase *pde6b*, a rod-expressed  
577 gene, leads to several STOP codons in the catalytic domain (Lagman, et al. 2016). Mutations  
578 in this gene were associated with night-blindness and *retinitis pigmentosa* in humans  
579 (McLaughlin, et al. 1993; Gal, et al. 1994). Moreover, in mice affected by mutations in the  
580 ortholog of *pde6b*, rod photoreceptors degenerate during development resulting in a total  
581 absence of photoreceptors in the adult (Farber and Lolley 1974; Chang, et al. 2002).  
582 Most LoF mutations were found in the subset of non-visual opsins, which makes their  
583 functional impact difficult to evaluate as the functions of these genes are still poorly

584 understood. Two notable exceptions are *opn4m2* and *tmt3a*, pseudogenized in *S. anshuiensis*  
585 and *L. gibarensis* respectively, and known to be non-functional and as such involved in the  
586 deregulation of the circadian clock in *P. andruzzii*.

587

588 Circadian clock genes: in *S. rhinoceros*, both ohnologs of four circadian clock genes, *cry1b*,  
589 *cry2a*, *per2* and *cry-dash*, carried LoF mutations. In *S. anshuiensis*, both ohnologs of *cry-dash*  
590 carried also LoF mutations which are independent from those found in *S. rhinoceros*. The  
591 gene *cry-dash*, involved in photoreactivation DNA repair, is also pseudogenized in  
592 *Phreatichthys andruzzii* (Zhao, et al. 2018) as well as *per2* that could be involved in the  
593 disruption of the circadian rhythm in this species (Ceinos, et al. 2018).

594

595 Pigmentation genes: both *L. dentata* (depigmented skin) and *L. gibarensis* (pigmented skin)  
596 carried independent LoF mutations in *myo7ab*. While no *myo7ab*<sup>-/-</sup> mutant has been  
597 analyzed, the paralog *myo7aa*<sup>-/-</sup> mutant in zebrafish showed an elevated photoreceptor death  
598 but pigmentation was not affected (Wasfy, et al. 2014). Both *Lucifuga* species had  
599 independently fixed LoF mutations in *smtla* which is known to increase the number of  
600 leucophores at the expense of a reduced number of xanthophores in medaka (Fukamachi, et  
601 al. 2009). In *L. dentata*, *slc2a11b* is pseudogenized and this gene codes for a protein that  
602 promotes yellow pigmentation (Kimura, et al. 2014; Parichy and Spiewak 2015). Two other  
603 genes, *trpm1a* and *trpm1b* are also pseudogenized in *L. dentata*. During zebrafish  
604 development, *trpm1a* is expressed in the retina and melanophores whereas *trpm1b* expression  
605 is restricted to the retina (Kastenhuber, et al. 2013). In human, mutations in their ortholog  
606 TRPM1 lead to complete congenital stationary night blindness (Audo, et al. 2009). In *L.*  
607 *gibarensis*, *pax7* which promotes xanthophore differentiation (Nord, et al. 2016) carried a LoF  
608 mutation as well as *edn3b* that is known to lead to a reduction in iridophore numbers when



609 mutated in zebrafish (Krauss, Frohnhöfer, et al. 2014). In *Astyanax mexicanus*, two  
610 pigmentation genes were found with LoF mutations: *mc1r* which carried a 2 bp deletion that  
611 could be involved in pigmentation reduction in two cave populations belonging to this species  
612 (Gross, et al. 2009) and *tyrp1a* which carried a 1 bp deletion. In zebrafish, morpholino-  
613 induced knock-down of *tyrp1a* had no phenotypic effect (Krauss, Geiger-Rudolph, et al.  
614 2014). In *S. rhinoceros* (pigmented skin) and *S. anshuiensis* (depigmented skin) both  
615 ohnologs of *gch2* and *pmelb* carried independent LoF mutations. It has been shown that *gch2*  
616 mutant lacked proper xanthophore pigmentation at larval stages in zebrafish but no effect  
617 were reported in the adult (Parichy, et al. 2000; Pelletier, et al. 2001; Lister 2019). In the same  
618 way, injection of *pmelb* morpholinos in the zebrafish had no significant effect on the number  
619 of melanosome but led to a significant loss of their cylindrical shape (Burgoyne, et al. 2015).  
620 Many pigmentation pseudogenes seem to be compensated by their teleost-specific duplicates  
621 when lost in zebrafish, such as *tyrp1a* (Krauss, Geiger-Rudolph, et al. 2014), *pmelb*  
622 (Burgoyne, et al. 2015) and *pax7b* (Nord, et al. 2016).

623

## 624 **Contrasted decay of eye genes vs circadian clock and pigmentation genes**

625

626 In order to study pseudogenization in relation to the regression of three traits in cavefishes, we  
627 defined three categories, that are eye, circadian clock and pigmentation genes. For most  
628 genes, assigning a gene to a category was straightforward, yet for some genes it was more  
629 ambiguous. Most eye genes corresponded to a set of genes expressed only in eyes, however  
630 fishes also express several non-visual opsins genes that we assigned to this category on the  
631 basis of their homology to visual opsins. Genes known for being involved in the circadian  
632 clock were assigned to a second set of genes. Noteworthy, some non-visual opsins are  
633 involved in this process. Pigmentation genes comprised a large set of genes involved in

634 several processes from pigment cell differentiation to pigment synthesis. Our *a priori*  
635 hypothesis was that eye genes should be more prone to degenerate in blind fishes as there are  
636 only expressed in eyes or involved in light sensing in other tissues, whereas many circadian  
637 clock and pigmentation genes may be maintained as their expression is not restricted to  
638 regressed structures and have pleiotropic roles. Indeed, while many pseudogenes were  
639 identified among eye genes of some cavefishes, a much smaller proportion of pseudogenes  
640 were found among circadian clock and pigmentation genes. In addition, several cases of  
641 parallel fixation of LoF mutations in different species among a small subset of genes  
642 suggested that only few genes involved in the circadian clock and pigmentation can be lost in  
643 cavefishes.

644

#### 645 **Molecular evidence of circadian clock disruption in several cavefishes**

646

647 No LoF mutations were found in the set of circadian clock genes of both *Lucifuga* species.  
648 However, *tmt3a*, a non-visual opsin is pseudogenized in *L. gibarensis* and the loss of this gene  
649 is involved in the disruption of the circadian rhythm in the cavefish *Phreatichthys andruzzii*.  
650 Whereas the survey of LoF mutations did not allow to find evidence of circadian clock loss in  
651 *L. dentata*, it is probably the case in *L. gibarensis*. Selection on circadian clock genes is also  
652 supported by the analysis of non-synonymous mutations which suggested no higher  
653 deleterious mutation accumulation in these species when compared with surface fishes.  
654 As expected, no LoF mutations in both ohnologs of circadian clock genes and non-visual  
655 opsin genes was found in *S. grahami* which is a surface fish. Unexpectedly, the small-eyed *S.*  
656 *rhinoceros* has accumulated more circadian clock pseudogenes (*per2*, *cry-dash*, *cry1b*,  
657 *cry2a*) than the blind *S. anshuiensis* (*cry-dash*), suggesting that the level of eye regression  
658 could be loosely correlated with the level of circadian clock disruption. Moreover, as several

659 independent LoF mutations were found in a small number of circadian clock genes, some of  
660 them already known to be involved in the circadian clock disruption in other species, it  
661 suggests that pseudogenization of a small subset of genes can be involved in this process, in  
662 particular those belonging to cryptochromes and period families which are light-inducible  
663 genes.

664

### 665 **A small subset of pigmentation pseudogenes**

666

667 A similar trend was observed among pigmentation genes: independent LoF mutations were  
668 found in *myo7ab* and *smtla* of *L. dentata* and *L. gibarensis* and both ohnologs of *gch2* and  
669 *pmelb* carried independent LoF mutations in *S. anshuiensis* and *S. rhinoceros*. Recurrent  
670 pseudogenization of the same genes suggests that a very small subset of pigmentation genes  
671 can be lost, and that these genes might be those which have no or few pleiotropic effects.  
672 Indeed, many pigmentation genes code for transcription factors or signaling molecules  
673 involved in neural crest-derived, pigment cell differentiation, that are repeatedly used at  
674 different times and places during development (Betancur, et al. 2010).

675

### 676 **Many eye pseudogenes in the ancient diploid cavefish *Lucifuga dentata***

677

678 Before the present study, there was no evidence on the possibility of pseudogenization of  
679 many eye genes in blind cavefishes. In *L. dentata*, we found up to 25% of eye genes carrying  
680 LoF mutations. Moreover, the distribution of LoF among genes is consistent with neutral  
681 evolution of a large proportion of, if not all, eye genes in this species. On the other hand, in *L.*  
682 *gibarensis* which has small but functional eyes, most eye genes seem under selection but the  
683 partial degeneration of the visual system is correlated with the loss of several genes well

684 conserved in eyed fishes. These data allowed us to propose a two-step scenario for the release  
685 of selection pressure on eye genes in this genus. The common ancestor of *L. dentata* and *L.*  
686 *gibarensis* was an eyed cavefish that had accumulated a small number of pseudogenes in  
687 relation to life in darkness, but none among eye specific genes. In *L. gibarensis*, most eye  
688 specific genes have been under purifying selection whereas it has been relaxed in *L. dentata*.  
689 Interestingly, the population of *A. mexicanus* from the Pachón cave which is very recent but in  
690 which cavefish have highly degenerated eyes, only one eye gene carried a LoF mutation. The  
691 lack of correlation between the degree of eye regression and the number of eye pseudogenes  
692 underscores the fact that the extent of visual regression should not be taken as a proxy of the  
693 evolutionary age of cavefish populations or species.

694

#### 695 Dating blindness in *L. dentata*

696

697 Dating changes in selective constraints on traits and genes after cave settlement is a difficult  
698 task. Several closely-related methods have been proposed to estimate when a change of  
699 selective regime occurred on one gene in one lineage, that is when  $\omega$  shifted from a value  
700 lower than one (a signature of purifying selection) to one (a signature of neutral evolution)  
701 (Li, et al. 1981; Miyata and Yasunaga 1981; Meredith, et al. 2009; Zhao, et al. 2010;  
702 Wertheim, et al. 2015). With two different methods (Li, et al. 1981; Meredith, et al. 2009), we  
703 estimated that the time since selection was released on the eye genes of *Lucifuga dentata* is  
704 between 1.3 Mya and 1.5 Mya. Taking into account that 19 pseudogenes were found among  
705 76 eye genes that may be dispensable for a blind fish, and assuming a LoF mutation rate equal  
706 to  $0.072 \times 10^{-8}$  per site per generation, we estimated the time since *L. dentata* settled in caves  
707 about 380,000 generations ago. The generation time is unknown for this fish, and translating  
708 the number of generations into years is difficult. However, assuming that the generation time

709 is about four years, which is realistic if we consider that they could reproduce during about  
710 ten years, the above independent estimations of relaxed selection would be coherent.  
711 Moreover, using the distribution of the MutPred2 scores, we obtained another and very close  
712 estimation (1.4 Ma). Our results suggest that *L. dentata* and *L. gibarensis* could have diverged  
713 more than 4 million years ago. The common ancestor of these species could have had well  
714 developed eyes that slightly regressed in one lineage (*L. gibarensis*) but much more in the  
715 other (*L. dentata*) after a long period without degeneration; or else, the ancestor could have  
716 had small eyes like *L. gibarensis* which after a long stasis completely degenerated in the  
717 lineage leading to *L. dentata* but remained almost unchanged in the lineage leading to *L.*  
718 *gibarensis*.  
719 Thus, the magnitude of eye degeneration that is often used as a proxy of the age of cave  
720 species because it is assumed that eyes degenerate gradually and continually in such  
721 environment is likely often misleading. A refined analysis of fish ecology is necessary to  
722 better understand the pace and the level of eye degeneration. Indeed, caves are often described  
723 as repetitions of the same environment, that is highly isolated and totally dark. However,  
724 some cavefishes such as *Lucifuga gibarensis* and closely-related small eyed species can be  
725 found in caves that are partially lighted, or sink holes in the sea. Such a complex environment  
726 could be the reason for the maintenance of small yet functional eyes in these species, like in  
727 fossorial mammals.

728

729 **Pattern of LoF mutations in recent tetraploids with different level of**  
730 **troglomorphy: the case of *Sinocyclocheilus***

731

732 The genus *Sinocyclocheilus*, which is endemic to southwestern karst areas in China, is the  
733 largest cavefish genus known to date (Xiao, et al. 2005). LoF mutations were found in several

734 genes of three species, one species (*S. anshuensis*) being blind and depigmented, another  
735 species (*S. rhinoceros*) having small eyes and being pigmented, and the last one (*S. grahami*)  
736 showing no such troglomorphic traits (Yang, et al. 2016). These species share a WGD with  
737 other cyprinids such as the common carp *Cyprinus carpio* (David, et al. 2003; Yuan, et al.  
738 2010) which could explain why even the surface fish carry many LoF mutations in eye,  
739 circadian clock and pigmentation genes (Yang, et al. 2016). However, no thorough  
740 comparisons were performed. Our results are consistent with a rapid radiation within this  
741 genus (Xiao, et al. 2005) as only few LoF mutations were found in internal branches of their  
742 phylogenetic tree. The divergence between *Cyprinus carpio* and the *Sinocyclocheilus* species  
743 may have occurred soon after the WGD as only two shared LoF mutations were found. The  
744 number of eye pseudogenes in the blind *S. anshuensis* is much higher than in the small-eyed  
745 *S. rhinoceros* and the eyed *S. grahami*, a result supporting the cumulative effect of  
746 tetraploidy and cave settlement on the rate of accumulation of LoF mutations. As most genes  
747 are present twice, a gene function is lost if, and only if, at least one LoF mutation is present in  
748 each ohnolog. With this criterion, seven genes were lost in *S. anshuensis*, but only one gene  
749 in *S. rhinoceros* and *S. grahami*. Selective pressure was relaxed on one copy of these genes  
750 after the WGD, but a complete relaxation occurred only after cave settlement in *S.*  
751 *anshuensis*. Among the genes for which both ohnologs are mutated in *S. anshuensis*, the  
752 mutations in *pde6c* could have a role in photoreceptors degeneration, as suggested by a study  
753 of zebrafish mutants (Stearns, et al. 2007). *Sinocyclocheilus rhinoceros* lost the two  
754 functional copies of *gcap1* and it has been shown that two missense mutations in this gene  
755 lead to significant disruptions in photoreceptors and retinal pigment epithelium, together with  
756 atrophies of retinal vessels and choriocapillaris in zebrafish (Chen, et al. 2017). However,  
757 knockout of *gcap1* in mice showed that its absence does not change expression level of other

758 phototransduction proteins thanks to a compensation by *gcap2*. Nevertheless, the knock-down  
759 leads to a delayed recovery after light exposure (Makino, et al. 2012).

760 Analyses with RELAX and the estimation of the admixture of MutPred2 score distributions  
761 that best fit with the observed score distribution also suggest that purifying selection on eye  
762 genes is much higher in *S. grahami* than in *S. anshuiensis* and *S. rhinoceros*, much lower on  
763 circadian genes of *S. rhinoceros* but high on pigmentation genes in these three species.

764 These results are congruent with the level of pseudogenization observed for the three gene  
765 sets in the three species.

766

### 767 *Very few pseudogenes in the recent settler *Astyanax mexicanus**

768

769 In the reference genome of *Astyanax mexicanus* cavefish, a LoF has been found in the eye  
770 gene *pde6b*. This mutation went unnoticed in previous studies but may well contribute to  
771 retinal degeneration. No LoF were found in clock genes. Among pigmentation genes, a 1 bp  
772 deletion was found in *tyrp1a* and a 2 bp deletion in *mc1r*. The latter mutation has been  
773 associated with the brown phenotype of some populations (Gross, et al. 2009) but the finding  
774 of a close and functional tandem duplicate suggest that it actually may not be the cause of this  
775 phenotype (Gross, et al. 2017). Overall, these results are in accordance with a very recent  
776 settlement of *Astyanax* cavefish (Fumey, et al. 2018) that did not allow the fixation of many  
777 eye pseudogenes despite the lack of purifying selection on most, if not all, eye genes. The  
778 extreme eye degeneration with only one LoF in *Astyanax* cavefish eye genes further questions  
779 the nature of the developmental mechanisms involved in eye loss in this species, the pace of  
780 eye degeneration and the correlation of eye degeneration with gene decay.

781

### 782 *Contrasted dynamics of pseudogenization in fossorial mammals and cavefishes*

783

784 The genomes of three independently-evolved fossorial mammals have previously allowed an  
785 extensive study of LoF mutations in genes coding for proteins involved in retinal networks  
786 (Emerling and Springer 2014). These animals have functional eyes, but star-nosed moles  
787 often leave their burrows and have the greatest exposure to light whereas naked mole-rats and  
788 Cape golden moles are entirely subterranean. In addition, the eyes of Cape golden moles are  
789 subcutaneous. More pseudogenes were found in the Cape golden mole than in the naked-rat  
790 genome and the lowest number of pseudogenes was found in the star-nosed mole genome,  
791 suggesting that the decrease in retinal exposure to light allowed the decay of more eye genes.  
792 The most striking difference between cavefishes and fossorial mammals is that pseudogenes  
793 of cavefishes accumulated only one or a couple of LoF mutations per pseudogene whereas  
794 some pseudogenes of fossorial mammals carried a large number of LoF mutations. This  
795 difference in molecular decay strongly suggests that the fossorial mammals adapted to the  
796 subterranean environment a long time ago whereas colonisation of the dark environment is  
797 much more recent in the case of the cavefishes.

798

## 799 Conclusion

800

801 Our analyses suggest that blind cavefishes examined so far are not very ancient. They all lost  
802 their eyes during the Pleistocene, the oldest during early Pleistocene and the most recent  
803 during the late Pleistocene or even later in the Holocene. The sequencing of a large number of  
804 blind cavefish genomes will be necessary to identify the whole set of eye genes that are  
805 dispensable in the dark, when eyes are highly degenerated. Moreover, finding a blind cavefish  
806 genome in which most eye genes are pseudogenized and carry many LoF mutations would



807 refute our current working hypothesis that blind cavefishes cannot thrive for a very long time  
808 in cave ecosystems.

809

## 810 **Materials and Methods**

811

### 812 *Assembly of L. dentata and L. gibarensis draft genomes*

813

814 The sequenced *L. dentata* specimen was a female, blind and depigmented. All the fish  
815 belonging to this species are blind whereas their pigmentation is highly variable (Garcia-  
816 Machado, unpublished data). The sequenced *L. gibarensis* specimen was a male, had small  
817 eyes and was pigmented. All the fish belonging to this species have small eyes whereas their  
818 pigmentation is also highly variable (García-Machado, et al. 2011). DNA was extracted using  
819 a protocol already described elsewhere (García-Machado, et al. 2011). For *L. dentata*, paired-  
820 end libraries were prepared with different insert sizes: 200 bp, 400 bp and 750 bp. A mate-  
821 pair library was also prepared with insert size in the range 3-5 kb. For *L. gibarensis*, only one  
822 mate-pair library was prepared, which had inserts size between 3 kb and 10 kb. *Lucifuga*  
823 *dentata* libraries were sequenced on an Illumina HiSeq 2000 sequencer whereas *L. gibarensis*  
824 library was sequenced on an Illumina NextSeq sequencer. After cleaning steps (adaptors  
825 trimming and quality trimming), *L. dentata* assembly of a draft genome was performed using  
826 Minia (Chikhi and Rizk 2013) on all data, resulting in 662,154 contigs. After assembling, and  
827 as Minia doesn't use the paired-end information, scaffolding steps were performed using  
828 SSPACE (Boetzer, et al. 2011) on one library at a time in ascending order of insert size. The  
829 number of scaffolds decreased from 662,154 to 161,599 with the first library (insert size of  
830 200 bp), to finish with 48,241 scaffolds with the mate pair library. This result was corrected

831 by REAPR (Hunt, et al. 2013) to obtain 52,944 scaffolds. The remaining gaps were filled by  
832 GapCloser (Luo, et al. 2012).

833 The quality and completeness of the draft genome of *L. dentata* were assessed by remapping  
834 paired-end reads to the assembly using BWA v0.7.11 (Li and Durbin 2009) and BUSCO  
835 (Kriventseva, et al. 2015) with the Actinopterygii dataset comprising a total of 4,584  
836 conserved genes. The latter analysis was performed also on published draft genomes of three  
837 other Ophidiiformes (*Brotula barbata*, *Carapus acus* and *Lamprogrammus exutus*).  
838 Sequences from *L. gibarensis* were mapped on the genome of *L. dentata* using BWA v0.7.11.  
839

#### 840 *Assembly of Lucifuga dentata* transcriptome

841

842 Gonads, gills, heart and brain were dissected and stored in RNA-Later (Ambion). Total RNA  
843 isolation (using Trizol) lead to yields of 870 ng/μl in gonads, 750 ng/μl in gills, 240 ng/μl in  
844 heart, 390 ng/μl in brain. ARN from gonads, gills and heart were mixed in equal proportions  
845 to construct the first library. ARN from the brain was used to construct the second library.  
846 For library preparation, polyA + RNA were extracted, fragmented, and directional libraries  
847 were prepared using the Small RNA Sample Prep Kit (Illumina). Both libraries were  
848 sequenced on an Illumina NextSeq500, on a Paired-end 2x150 bp run, using the High Output  
849 Kit 300 cycles sequencing kit. After cleaning steps (adaptors trimming and quality trimming),  
850 a *de novo* transcriptome assembly was obtained using Trinity and a quality assessment was  
851 realized following Trinity recommendations  
852 ([https://github.com/trinityrnaseq/trinityrnaseq/wiki/Transcriptome-Assembly-Quality-](https://github.com/trinityrnaseq/trinityrnaseq/wiki/Transcriptome-Assembly-Quality-Assessment)  
853 [Assessment](https://github.com/trinityrnaseq/trinityrnaseq/wiki/Transcriptome-Assembly-Quality-Assessment)).

854

#### 855 *Annotation of Lucifuga dentata* draft genome

856

857 First, repetitive elements were identified using RepeatMasker v4.0.7 (Smit, et al. 2013), Dust  
858 (Morgulis, et al. 2006) and TRF v4.09 (Benson 1999). A species specific *de novo* repeat  
859 library was built with RepeatModeler v1.0.11 (Smit and Hubley 2008) and repeated regions  
860 were located using RepeatMasker with the *de novo* and *Danio rerio* libraries. Bedtools  
861 v2.26.0 (Quinlan and Hall 2010) were used to merge repeated regions identified with the three  
862 tools and to soft mask the genome. Then, MAKER3 genome annotation pipeline v3.01.02-  
863 beta (Holt and Yandell 2011) combined annotations and evidence from three approaches:  
864 similarity with fish proteins, assembled transcripts and *de novo* gene predictions. Protein  
865 sequences from 11 other fish species (*Astyanax mexicanus*, *Danio rerio*, *Gadus morhua*,  
866 *Gasterosteus aculeatus*, *Lepisosteus oculatus*, *Oreochromis niloticus*, *Oryzias latipes*,  
867 *Poecilia formosa*, *Takifugu rubripes*, *Dichotomyctere nigroviridis*, *Xiphophorus maculatus*)  
868 found in Ensembl were aligned to the masked genome using Exonerate v2.4 (Slater and  
869 Birney 2005). RNA-Seq reads were mapped to the genome assembly using STAR v2.5.1b  
870 (Dobin, et al. 2013) with outWigType and outWigStrand options to output signal wiggle files.  
871 Cufflinks v2.2.1 (Trapnell, et al. 2010) was used to assemble the transcripts which were used  
872 as RNA-seq evidence. A *de novo* gene model was built using Braker v2.0.4 (Hoff, et al. 2016)  
873 with wiggle files provided by STAR as hints file for GeneMark and Augustus trainings. The  
874 best supported transcript for each gene was chosen using the quality metric called Annotation  
875 Edit Distance (AED) (Eilbeck, et al. 2009). The annotation completeness of coding genes was  
876 assessed by BUSCO using the Actinopterygii gene set. Homology to uniprot database was  
877 used to infer functions of predicted genes with Blastp and an e-value cutoff of  $1e^{-6}$ .  
878 Interproscan 5.35 (Jones, et al. 2014) was used to detect proteins with known functional  
879 domains.

880

## 881 Analysis of repeated elements

882

883 The *de novo* library of repeated elements was refined with the following procedure: removal  
884 of short (<80 bp) consensus repeats; reannotation of satellite sequences as well as of putative  
885 DNA or LTR transposable elements (TEs) by aligning each consensus against itself (this  
886 procedure allows to visualize internal repeats); Blastn (Altschul, et al. 1990) of the library  
887 against itself and removal of redundant TEs; Blastx (Altschul, et al. 1990) of « Unknown »  
888 repeats against the NCBI protein database and removal of multigene families erroneously  
889 identified as putative TEs; reannotation of putative SINEs according to the SINE-scan  
890 program (Mao and Wang 2017). Finally, the library was manually curated: consensus  
891 sequences were compared to an in-house library of transposable element proteins using  
892 BlastX. Matching Unknown elements were renamed according to their hits against this  
893 library. Consensus sequences showing incongruent annotations between RepeatModeler  
894 automatic classification and our manual annotation were further submitted to Censor  
895 (Kohany, et al. 2006). This TE library was used as repeat database for a RepeatMasker search  
896 in the genome (Smit, et al. 2013). Overlaps in RepeatMasker output were discarded by  
897 selecting highest scoring elements. Repeat fragments closer than 20 bp and having the same  
898 name were merged. The Landscape was reconstructed from RepeatMasker align output using  
899 the calcDivergenceFromAlign.pl and createRepeatLandscape.pl utilities of the RepeatMasker  
900 suite.

901

## 902 Identification of eye, circadian and pigmentation genes

903

904 The set of eye genes included all opsins, visual opsins that are expressed in eye photoreceptor  
905 cells (cone and rods) but also non-visual opsins that are expressed in a wide variety of tissues.

906 It also comprised eye specific crystallin genes. Crystallin genes code for several families of  
907 proteins that are implicated in the transparency of the lens and fine tuning its refraction index,  
908 but can also have other functions, not well known for many of them (Thanos, et al. 2014).  
909 Expression patterns in zebrafish reported in ZFIN database (<https://zfin.org/>) and in *A.*  
910 *mexicanus* (Hinaux, et al. 2015) were used to identify and select a subset of eye specific  
911 crystallins. Noteworthy, *crygm2* paralogs were excluded from the analysis because many  
912 copies (more than 50 copies in *A. mexicanus*) were found as in other fish genomes most likely  
913 allowing relaxed selection on some copies independently to relaxed selection due to  
914 environmental shift. The set of eye genes also included genes coding for proteins involved in  
915 the phototransduction cascade: RPE65, Arrestins, Recoverins, Transducins, PDE6, CNGA3  
916 and CNGB3, GCAPs, zGCs, and GRKs. These genes code for a highly heterogeneous set of  
917 proteins with regard to their structure and functions (Imanishi, et al. 2002; Wada, et al. 2006;  
918 Schonthaler, et al. 2007; Matveev, et al. 2008; Nishiwaki, et al. 2008; Räscho, et al. 2009;  
919 Renninger, et al. 2011; Fries, et al. 2013; Lagman, et al. 2015; Zang, et al. 2015; Lagman, et  
920 al. 2016). Only genes whose expression was restricted to the retina and/or the pineal complex  
921 were retained. Sets of circadian clock and pigmentation genes were defined on the basis of  
922 gene lists established in previous studies (Li, et al. 2013; Lorin, et al. 2018). The set of  
923 circadian genes was completed with *ck1 δa* and *ck1 δb* genes which are specific kinases of *cry*  
924 and *per* genes (Takahashi, et al. 2008) and *aanat1* and *aanat2* genes whose expression are  
925 regulated by the circadian clock in zebrafish (Vatine, et al. 2011). The sequences of visual and  
926 non-visual opsins of zebrafish were retrieved from (Davies, et al. 2015). Other eye genes,  
927 circadian and pigmentation genes of zebrafish were retrieved from GenBank.  
928 Series of blastn and tblastx (Altschul, et al. 1990) with zebrafish sequences were performed  
929 against *A. mexicanus* surface and Pachón cave genomes (GCF\_000372685.2 and  
930 GCF\_000372685.1 respectively), *S. grahami*, *S. rhinocerosus*, *S. anshuiensis*, *P. nattereri*, *B.*

931 *barbata*, *C. acus* and *L. exutus* genomes (GCF\_001515645.1, GCF\_001515625.1,  
932 GCF\_001515605.1, GCF\_001682695.1, GCA\_900303265.1, GCA\_900312935.1 and  
933 GCA\_900312555.1 respectively), and *L. dentata* and *L. gibarensis* genomes (this study).  
934 Matching regions were extracted using samtools (Li 2011) and coding DNA sequences (CDS)  
935 were predicted using Exonerate with protein sequences of zebrafish (Slater and Birney 2005).  
936

### 937 Phylogenetic analyses

938  
939 Orthologous and paralogous relationships between genes were inferred through phylogenetic  
940 analyses. First, coding sequences were aligned using MUSCLE (Edgar 2004), after having  
941 taken into account indels (*i.e.* adding N where nucleotides were missing or removing  
942 additional nucleotides). For each alignment, DNA sequences were translated into protein  
943 sequences and a maximum likelihood phylogenetic tree was inferred using IQ-TREE  
944 (Nguyen, et al. 2015) with the optimal model found by ModelFinder (Kalyaanamoorthy, et al.  
945 2017) and the robustness of the nodes was evaluated with 1,000 ultrafast bootstraps (Hoang,  
946 et al. 2018). The trees were rooted and visualized using iTOL (Letunic and Bork 2006).  
947 Phylogenetic trees and IQ-TREE files can be found in **supplementary folder phylogenies**,  
948 **Supplementary Material** online.

949

### 950 Identification of LoF mutations

951

952 We classified CDS in three classes: 1) complete, 2) pseudogene (characterized by the  
953 presence of at least one among the following mutations: an internal STOP codon, an indel  
954 leading to a frameshift, the loss of the initiation codon, the loss of the STOP codon, a  
955 mutation in a splice site of an intron), 3) incomplete. Incomplete genes can be artifacts of

956 different origins such as missing data, assembly errors (Florea, et al. 2011) and gene  
957 prediction errors due to sequence divergence. Nonetheless, they can be real, resulting from  
958 large genomic deletions. In the case of the *A. mexicanus* cavefish genome, using PCR, we  
959 could check that about 85% of the incomplete genes were assembly errors (data not shown)  
960 and they were not further analyzed. Given the low quality of the *A. mexicanus* cavefish  
961 genome assembly compared to the surface one and in order to get good gene sequences, cave  
962 reads were retrieved and mapped onto the surface genome using the NCBI remapping service.  
963 This approach allowed the identification of an opsin gene repertoire (36 genes) slightly larger  
964 than the one recently published (33 genes) using only the cavefish genome (Simon, et al.  
965 2019). Similarly, *Lucifuga gibarensis* reads were mapped on the *Lucifuga dentata* genome.  
966 Orthologous genes from a cod (*Gadus morhua*), a medaka (*Oryzias latipes*), a platyfish  
967 (*Xiphophorus maculatus*), a stickleback (*Gasterosteus aculeatus*), a pufferfish  
968 (*Dichotomyctere nigroviridis*), a tilapia (*Oreochromis niloticus*) and a spotted gar  
969 (*Lepisosteus oculatus*) were downloaded from Ensembl (Ensembl IDs can be found in  
970 **supplementary Data\_SuppS2, Supplementary Material** online). For these fishes, visual  
971 opsin sequences were retrieved from an extensive study at the scale of ray-finned fishes (Lin,  
972 et al. 2017).

973

## 974 Testing randomness of LoF mutation locations along the genes

975

976 In order to evaluate whether LoF mutations were randomly distributed or clustered along the  
977 genes, we used a method initially designed for estimating the randomness of intron insertions  
978 (Lynch and Kewalramani 2003). We computed the effective number of gene segments  
979 defined by:  $n_s = 1/\sum_{i=1}^n s_i^2$ , with  $n$  being the number of segments of genes separated by  $n-1$   
980 LoF mutations and  $s_i$  being the length of the  $i$ th segment. As LoF mutations are found in

981 several genes with different lengths, the position of each LoF mutation was normalized by  
982 dividing by the length of the coding sequence, the sum of  $s_i$  was thus equal to 1 for each gene.  
983 The most extreme case of LoF dispersion is the one in which all segments are of the same  
984 length ( $1/n$ ), *i.e.* the LoF mutation are regularly spaced out, yielding  $n_s = n$ . On the other hand,  
985 if all LoF are clustered at one end of the genes, one segment approaches length 1.0, while all  
986 others approach 0.0, yielding  $n_s = 1$ . In order to obtain the distribution of the values of  $n_s$   
987 under the null model of fixation of LoF at random positions, 100,000 simulations of random  
988 distribution of the observed number of LoF mutations along a gene of length 1.0 were  
989 performed.

990

991 Estimation of the number of eye genes under relaxed selection in *Lucifuga* spp.

992 using the distribution of LoF mutations per gene

993

994 In order to estimate the number genes under relaxed selection ( $V$ ) in a sample of *a priori*  
995 useless eye genes ( $T$ ) in *L. dentata* and *L. gibarensis*, we compared the observed distribution  
996 of LoF mutations per eye gene with the expected distribution, taking into account that only a  
997 fraction ( $V$ ) of these genes are under relaxed selection and can accumulate LoF mutations and  
998 that  $T - V$  genes are under selection and cannot carry LoF mutations. Assuming that a LoF  
999 mutation has a probability  $1/V$  to appear in a gene among  $V$  genes under relaxed selection, the  
1000 probability that a gene contains  $X$  LoF mutations can be computed as follows:

1001 
$$p(X = 0) = \frac{V}{T} \left(1 - \frac{1}{V}\right)^m + \frac{T-V}{T} \quad \text{if } i = 0$$

1002 
$$p(X = i) = \frac{V}{T} \frac{m!}{i!(m-i)!} \left(\frac{1}{V}\right)^i \left(1 - \frac{1}{V}\right)^{m-i} \quad \text{if } i \neq 0$$

1003 where  $m$  is the total number of LoF mutations.



1004 In order to take into account that eye genes do not have the same length and the same number  
1005 of introns and thus mutations do not have the same probability of occurring in each gene (they  
1006 are more likely in a gene with several large exons and several introns than in a gene with only  
1007 one short exon), we ran 10,000 simulations of the distribution of  $m$  mutations in a random  
1008 sample of  $V$  genes taken at random among  $T$  eye genes, and taking into account the length and  
1009 the number of introns in each gene to estimate its relative mutation rate. The distributions of  
1010 the number of LoF mutations per gene in *L. dentata* and *L. gibarensis* were compared with  
1011 expected distributions obtained with the two methods described above and for different values  
1012 of  $V$ .

1013

#### 1014 **Sequence divergence and evidence of relaxed selection in cavefishes**

1015

1016 For diploid species, genes belonging to the same gene set (eye, circadian clock or  
1017 pigmentation) were concatenated. In order to analyze the genes of the tetraploid  
1018 *Sinocyclocheilus* species, another alignment was produced in which each ohnolog of a given  
1019 gene was concatenated with one ohnolog taken at random of the other genes, leading to two  
1020 sets of concatenated genes for each species. With both alignments of concatenated sequences,  
1021 maximum likelihood estimates of  $\omega$  were obtained using the program codeml from the PAML  
1022 package (Yang 2007) with a free-ratio model allowing a different ratio for each branch  
1023 (**supplementary fig. S13, Supplementary Material** online).

1024

1025 Another approach used for detecting relaxed selection was based on analyses with the  
1026 program RELAX (Wertheim, et al. 2015), assigning surface fishes as reference and excluding  
1027 the small eyed fish *Lucifuga gibarensis*, the eyeless fishes *Lucifuga dentata* and *Astyanax*  
1028 *mexicanus* CF. Each cavefish was independently assigned as the test branch. The value of the

1029 parameter  $k$  which is  $<1$  if selection is relaxed and  $>1$  if selection is intensified was  
1030 considered as evidence of a change in the selective regime (**supplementary fig. S14, fig. S15**  
1031 and **fig. S16, Supplementary Material** online).

1032

### 1033 [Inferring the deleterious impact of amino acid variants with MutPred2](#)

1034

1035 Maximum likelihood inference of amino acids substitutions were performed using the  
1036 program aaml from the PAML package (Yang 2007). For each amino acid substitution,  
1037 MutPred2 scores (Pejaver, et al. 2017) and Grantham's distances (Grantham 1974) were  
1038 computed to estimate the deleterious impact of the substitutions.

1039 In order to compare the distribution of scores (or distances) for a set of genes and along a  
1040 branch with the distribution expected under relaxed selection, simulations of random  
1041 substitutions were generated in these genes, taking into account the length of the coding  
1042 sequence of each gene and the transition/transversion ratio  
1043 ([https://github.com/MaximePolicarpo/Molecular-decay-of-light-processing-genes-in-](https://github.com/MaximePolicarpo/Molecular-decay-of-light-processing-genes-in-cavefishes/blob/master/Neutral_evolution_for_mutpred.py)  
1044 [cavefishes/blob/master/Neutral\\_evolution\\_for\\_mutpred.py](https://github.com/MaximePolicarpo/Molecular-decay-of-light-processing-genes-in-cavefishes/blob/master/Neutral_evolution_for_mutpred.py)). MutPred2 output files can be  
1045 found **supplementary folder MutPred2\_results, Supplementary Material** online).

1046

### 1047 [Dating relaxation of selection with the number of eye pseudogenes in \*L. dentata\*](#)

1048

1049 In absence of selection, the probability of fixation of a LoF mutation, initially absent in a  
1050 population, is:

$$1051 \quad p(1,0,t) = 1 - e^{-\mu_{LoF}t} \quad \text{if } N_e \ll 1/\mu_{LoF}$$

1052 where  $\mu_{LoF}$  is the LoF mutation rate,  $N_e$  is the effective population size and  $t$  is the number of  
1053 generations (Li and Nei 1977).

1054 Thus, if  $\mu_{LoF}$  is identical for a set of genes, the probability that D among T genes have fixed a  
1055 LoF after time  $t$  is:

$$p(X = D) = \frac{T!}{D!(T-D)!} (1 - e^{-\mu_{LoF}t})^D (e^{-\mu_{LoF}t})^{T-D}$$

1056 The derivative of this function with respect to  $t$  allows to find for which value of  $t$  the  
1057 probability  $p(X = D)$  is maximal:

$$t = \frac{1}{\mu_{LoF}} \ln\left(\frac{T}{T-D}\right)$$

1058 For a given set of genes, the rate of LoF mutation was computed as follows:

1059 *i)* The genetic code implies that among 549 (61 x 9) mutations in sense codons, 23 lead to a  
1060 STOP codon, that is ~ 4% if the frequency of each codon is 1/61 and transitions are as  
1061 frequent as transversions. As among those 23 mutations, 5 are transitions and 18 are  
1062 transversions, the transition/transversion ratio ( $r$ ) can be taken into account to estimate more  
1063 accurately the fraction of mutation leading to a STOP codon  $f = (5r + 18)/(183r + 366)$ .  
1064 Using a R script, the estimation of  $f$  was further refined by taking into account codon  
1065 frequencies (frequency\_new\_stop.py). For eye genes, taking into account estimations of  $r$  in  
1066 *Lucifuga* spp. and *Sinocyclocheilus* spp. (4.57 and 1.95 respectively) and the codon  
1067 frequencies of their eye gene sequences,  $f$  was estimated equal to 0.031 and 0.037 respectively  
1068 in these groups of species. Moreover, taking into account that 13 internal STOP codons were  
1069 found in *Lucifuga* spp. and 47 in *Sinocyclocheilus* spp., we estimated a weighted mean  $f =$   
1070 0.036 for the whole eye gene dataset. Applying the same approach, we found  $f = 0.038$  for the  
1071 circadian clock genes and  $f = 0.036$  for pigmentation genes (Details in **Data\_Suppl1**,  
1072 **Supplementary Material** online). For the three datasets taken together, weighting by the  
1073 length of the concatenated genes in each dataset, we estimated a global mean  $f = 0.036$ . For a  
1074 set of coding sequences of length  $l$  (sum of the CDS lengths), the rate of mutation to a STOP  
1075 codon  $\mu_{STOP} = f\mu l$ , where  $\mu$  is the nucleotide mutation rate / site.

1076 *ii*) The rate of indels leading to frameshifts (*i.e.* indel length modulo 3  $\neq$  0) relative to the rate

1077 of new STOP codons is  $\frac{n_f}{n_S}$ , where  $n_f$  and  $n_S$  are the numbers of indels leading to frameshifts

1078 and new STOP codons respectively. The rate of frameshifts is  $\mu_{frameshift} = \frac{n_f}{n_S} \mu_{STOP}$ .

1079 *iii*) The rate of splice site mutations is  $4n_i\mu$  (where  $n_i$  is the number of introns in the set of  
1080 genes).

1081 *iv*) The rate of START codon loss is  $3n_g\mu$  (where  $n_g$  is the number of genes).

1082 *v*) The rate of STOP codon loss is  $\frac{23}{27}3n_g$  (where  $\frac{4}{27}$  is the proportion of mutations in a STOP  
1083 codon which leads to another STOP codon).

1084 Globally, for the set of genes, the LoF mutation rate is

$$\mu_G = \left[ \left( 1 + \frac{n_f}{n_S} \right) fl + 4n_i + \frac{23}{27}3n_g \right] \mu$$

1085 if all genes have the same CDS length and the same number of introns.

1086 The rate of LoF mutations per gene is  $\mu_{LoF} = \frac{\mu_G}{n_g}$

1087 In order to assess the effect of the high variability of gene length and intron number observed

1088 in eye genes on pseudogene accumulation through time, a program was written to simulate

1089 decay of this set of genes through accumulation of STOP codons, frameshifts, splice site

1090 mutations, initiation and STOP codon losses, taking into account the length and the number of

1091 introns in each gene. At each generation and for each gene, the probability that a new LoF

1092 appears in one ancestral and functional allele at frequency  $q$  in a population of size  $N_e$  is:

1093  $2N_e q \mu_{LoF}$ . When a new LoF mutation appears its frequency is  $\frac{1}{2N_e}$  and the total frequency of

1094 LoF mutations is  $p + 1/2N_e$ , where  $p = 1 - q$ . We assumed random mating, no selection

1095 and no migration and a constant population size. Genetic drift between two generations was

1096 simulated taking into account the new allele frequencies if a mutation occurred, and  $2N_e$  (the

1097 number of alleles sampled to generate the next generation).

1098 The simulation program was written in Python  
1099 ([https://github.com/MaximePolicarpo/Molecular-decay-of-light-processing-genes-in-](https://github.com/MaximePolicarpo/Molecular-decay-of-light-processing-genes-in-cavefishes/blob/master/SimulationScript.py)  
1100 [cavefishes/blob/master/SimulationScript.py](https://github.com/MaximePolicarpo/Molecular-decay-of-light-processing-genes-in-cavefishes/blob/master/SimulationScript.py)).

1101

## 1102 Other methods for dating selection relaxation on eye genes of *L. dentata*

1103

1104 Eye genes of the two Cuban cave brotulas (*L. dentata* and *L. gibarensis*) and an outgroup  
1105 (*Brotula barbata*) were concatenated and aligned. We supposed that eye genes have been  
1106 under selection along the branches of the phylogenetic tree, except in the lineage leading to *L.*  
1107 *dentata* which is a mixed branch (with a period of time under selection followed by a period  
1108 of time under relaxed selection). The time since selection was relaxed was estimated using  
1109 two slightly different methods both relying on a shift of the nonsynonymous substitution rate  
1110 after relaxed selection (Li, et al. 1981; Meredith, et al. 2009). The time of divergence between  
1111 *Brotula barbata* and Cuban cave brotulas was set to 80 Mya (<http://www.timetree.org/>).

1112

1113 As an alternative approach, we used the distribution of MutPred2 scores in the lineage leading  
1114 to *L. dentata*. First we computed the proportions of two distributions, one under selection as  
1115 in the zebrafish lineage ( $p_s$ ) and one without selection as in simulated data ( $p_n$ ), that produce a  
1116 mixture distribution that best fit the distribution of MutPred2 scores in the lineage leading to  
1117 *L. dentata*. We assumed that  $\omega_s$  under selection shifted to  $\omega_n$  when selection is relaxed. We  
1118 called  $T_d$  the period of time since the separation of *L. dentata* and *L. gibarensis*,  $t_s$  the period of  
1119 time of evolution under selection and  $t_n$  the period of time under relaxed selection in the  
1120 lineage leading to *L. dentata*. In this lineage, the proportion of nonsynonymous substitutions  
1121 that accumulate under selection depends on  $\omega_s$  and  $t_s$  and the proportion of nonsynonymous

1122 substitutions that accumulate under relaxed selection depends  $\omega_n$  and  $t_n$ . Thus  $\frac{p_s}{p_n} = \frac{t_s \omega_s}{t_n \omega_n}$  or

$$1123 \quad t_n = \frac{\omega_s p_n}{\omega_n p_s} t_s$$

1124

## 1125 Comparison of eye gene decay in cavefishes and fossorial mammals

1126

1127 In order to compare the decay of eye genes in cavefishes and fossorial mammals, the number  
1128 of pseudogenes and the number of LoF mutations per pseudogene among genes coding for  
1129 proteins involved in retinal networks in three fossorial mammals (Cape golden mole  
1130 *Chrysochloris asiatica*, naked mole-rat *Heterocephalus glaber* and star-nosed moles  
1131 *Condylura cristata*) were retrieved from a publication (Emerling and Springer 2014).

1132

## 1133 Data Availability

1134 *Lucifuga dentata* Whole Genome Shotgun project has been deposited at  
1135 DDBJ/ENA/GenBank under the accession VXCM00000000. The version described in this  
1136 paper is version VXCM01000000

1137 *Lucifuga dentata* Transcriptome Shotgun Assembly project has been deposited at  
1138 DDBJ/EMBL/GenBank under the accession GIAU00000000. The version described in this  
1139 paper is the first version, GIAU01000000.

1140 *Lucifuga gibarensis* raw sequences were submitted to the SRA Bioproject: PRJNA610231  
1141 The original GFF3 annotation file of *Lucifuga dentata* and scaffolds smaller than 200 bp are  
1142 available in Supplementary files.

1143 Python programs and R scripts used in this paper can be found in:

1144 [https://github.com/MaximePolicarpo/Molecular-decay-of-light-processing-genes-in-](https://github.com/MaximePolicarpo/Molecular-decay-of-light-processing-genes-in-cavefishes)  
1145 cavefishes.

1146

## 1147 **Supplementary Material**

1148

1149 Supplementary data are available at Molecular Biology and Evolution.

1150

## 1151 **Acknowledgments**

1152

1153 This work was supported by a collaborative grant from Agence Nationale de la Recherche  
1154 (BLINDTEST to S.R. and D.C.) and from Institut Diversité Ecologie et Evolution du Vivant  
1155 (to S.R. and D.C). We thank Yan Jaszczyszyn, Jean Mainguy, Nina Paffoni and Isabelle  
1156 Germon for their help in sequencing and analyzing the genomes of *L. dentata* and *L.*  
1157 *gibarensis*. We also thank Carlsbergfondet for financial support (grant no. 2013\_01\_0501) for  
1158 sampling *Lucifuga gibarensis*.

1159

## 1160 **Ethics approval**

1161

1162 Animals were treated according to the French and European regulations for handling of  
1163 animals in research.

1164

## 1165 **Sampling authorization**

1166

1167 *Lucifuga dentata*: a permit [LH 112 AN (135) 2013] was provided to the Centro de  
1168 Investigaciones Marinas, University of Havana by the Cuban authorities in December 2013 to  
1169 study cave species diversity including nematodes, crustaceans and fishes. As the species was

1170 listed Vulnerable (VU) by the IUCN, only two adult individuals (MFP 18.000278) were  
1171 sampled (12 January 2014) from one of its largest and demographically stable populations  
1172 (Emilio Cave, Las Cañas, Artemisa Province, Cuba).

1173 *Lucifuga gibarensis*: a permit [PE 2014/82] was provided to the Centro de Investigaciones  
1174 Marinas, University of Havana by the Cuban authorities in November 2014 to study cave  
1175 species diversity including nematodes, crustaceans and fishes. A single adult fish (MFP  
1176 18.000279) was sampled (20 November 2014) from the Macigo Cave (Aguada de Macigo del  
1177 Jobal), Gibara, Holguín Province, Cuba.

1178

1179



## 1180 **References**

1181

- 1182 Albalat R, Cañestro C. 2016. Evolution by gene loss. *Nature Reviews Genetics* 17:379-391.
- 1183 Altschul SF, Gish W, Miller W, Myers EW, Lipman DJ. 1990. Basic local alignment search tool. *J Mol*
- 1184 *Biol* 215:403-410.
- 1185 Audo I, Kohl S, Leroy BP, Munier FL, Guillonneau X, Mohand-Saïd S, Bujakowska K, Nandrot EF, Lorenz
- 1186 B, Preising M, et al. 2009. TRPM1 is mutated in patients with autosomal-recessive complete
- 1187 congenital stationary night blindness. *American Journal of Human Genetics* 85:720-729.
- 1188 Beale A, Guibal C, Tamai TK, Klotz L, Cowen S, Peyric E, Reynoso VH, Yamamoto Y, Whitmore D. 2013.
- 1189 Circadian rhythms in Mexican blind cavefish *Astyanax mexicanus* in the lab and in the field. *Nature*
- 1190 *Communications* 4:2769.
- 1191 Benson G. 1999. Tandem repeats finder: a program to analyze DNA sequences. *Nucleic Acids*
- 1192 *Research* 27:573-580.
- 1193 Berning D, Adams H, Luc H, Gross JB. 2019. In-Frame Indel Mutations in the Genome of the Blind
- 1194 Mexican Cavefish, *Astyanax mexicanus*. *Genome Biol Evol* 11:2563-2573.
- 1195 Betancur P, Bronner-Fraser M, Sauka-Spengler T. 2010. Assembling Neural Crest Regulatory Circuits
- 1196 into a Gene Regulatory Network. *Annual Review of Cell and Developmental Biology* 26:581-603.
- 1197 Boetzer M, Henkel CV, Jansen HJ, Butler D, Pirovano W. 2011. Scaffolding pre-assembled contigs
- 1198 using SSPACE. *Bioinformatics* 27:578-579.
- 1199 Burgoyne T, Connor MN, Seabra MC, Cutler DF, Futter CE. 2015. Regulation of melanosome number,
- 1200 shape and movement in the zebrafish retinal pigment epithelium by OA1 and PMEL. *Journal of Cell*
- 1201 *Science* 128:1400-1407.
- 1202 Ceinos RM, Frigato E, Pagano C, Fröhlich N, Negrini P, Cavallari N, Vallone D, Fuselli S, Bertolucci C,
- 1203 Foulkes NS. 2018. Mutations in blind cavefish target the light-regulated circadian clock gene, period
- 1204 2. *Scientific Reports* 8:8754.
- 1205 Chang B, Hawes NL, Hurd RE, Davisson MT, Nusinowitz S, Heckenlively JR. 2002. Retinal degeneration
- 1206 mutants in the mouse. *Vision Res* 42:517-525.
- 1207 Chen X, Sheng X, Zhuang W, Sun X, Liu G, Shi X, Huang G, Mei Y, Li Y, Pan X, et al. 2017. GUCA1A
- 1208 mutation causes maculopathy in a five-generation family with a wide spectrum of severity. *Genetics*
- 1209 *in Medicine* 19:945-954.
- 1210 Chikhi R, Rizk G. 2013. Space-efficient and exact de Bruijn graph representation based on a Bloom
- 1211 filter. *Algorithms for Molecular Biology* 8:22.
- 1212 Culver DC, Pipan T. 2009. *The Biology of Caves and Other Subterranean Habitats*. Oxford: Oxford
- 1213 University Press.
- 1214 David L, Blum S, Feldman MW, Lavi U, Hillel J. 2003. Recent Duplication of the Common Carp
- 1215 (*Cyprinus carpio* L.) Genome as Revealed by Analyses of Microsatellite Loci. *Molecular Biology and*
- 1216 *Evolution* 20:1425-1434.
- 1217 Davies WIL, Tamai TK, Zheng L, Fu JK, Rihel J, Foster RG, Whitmore D, Hankins MW. 2015. An
- 1218 extended family of novel vertebrate photopigments is widely expressed and displays a diversity of
- 1219 function. *Genome Research* 25:1666-1679.
- 1220 Dobin A, Davis CA, Schlesinger F, Drenkow J, Zaleski C, Jha S, Batut P, Chaisson M, Gingeras TR. 2013.
- 1221 STAR: ultrafast universal RNA-seq aligner. *Bioinformatics* 29:15-21.
- 1222 Edgar RC. 2004. MUSCLE: multiple sequence alignment with high accuracy and high throughput.
- 1223 *Nucleic Acids Research* 32:1792-1797.
- 1224 Eilbeck K, Moore B, Holt C, Yandell M. 2009. Quantitative measures for the management and
- 1225 comparison of annotated genomes. *BMC Bioinformatics* 10:67.
- 1226 Emerling CA. 2018. Regressed but Not Gone: Patterns of Vision Gene Loss and Retention in
- 1227 Subterranean Mammals. *Integr Comp Biol* 58:441-451.

- 1228 Emerling CA, Springer MS. 2014. Eyes underground: Regression of visual protein networks in  
1229 subterranean mammals. *Molecular Phylogenetics and Evolution* 78:260-270.
- 1230 Fang X, Nevo E, Han L, Levanon EY, Zhao J, Avivi A, Larkin D, Jiang X, Feranchuk S, Zhu Y, et al. 2014.  
1231 Genome-wide adaptive complexes to underground stresses in blind mole rats *Spalax*. *Nature*  
1232 *Communications* 5:3966.
- 1233 Fang X, Seim I, Huang Z, Gerashchenko Maxim V, Xiong Z, Turanov Anton A, Zhu Y, Lobanov Alexei V,  
1234 Fan D, Yim Sun H, et al. 2014. Adaptations to a Subterranean Environment and Longevity Revealed by  
1235 the Analysis of Mole Rat Genomes. *Cell Reports* 8:1354-1364.
- 1236 Farber DB, Lolley RN. 1974. Cyclic Guanosine Monophosphate: Elevation in Degenerating  
1237 Photoreceptor Cells of the C3H Mouse Retina. *Science* 186:449-451.
- 1238 Feng D, Chen Z, Yang K, Miao S, Xu B, Kang Y, Xie H, Zhao C. 2017. The cytoplasmic tail of rhodopsin  
1239 triggers rapid rod degeneration in kinesin-2 mutants. *Journal of Biological Chemistry* 292:17375-  
1240 17386.
- 1241 Florea L, Souvorov A, Kalbfleisch TS, Salzberg SL. 2011. Genome Assembly Has a Major Impact on  
1242 Gene Content: A Comparison of Annotation in Two *Bos Taurus* Assemblies. *PLoS ONE* 6:e21400.
- 1243 Fries R, Scholten A, Säftel W, Koch K-W. 2013. Zebrafish Guanylate Cyclase Type 3 Signaling in Cone  
1244 Photoreceptors. *PLoS ONE* 8:e69656.
- 1245 Fukamachi S, Yada T, Meyer A, Kinoshita M. 2009. Effects of constitutive expression of somatolactin  
1246 alpha on skin pigmentation in medaka. *Gene* 442:81-87.
- 1247 Fumey J, Hinaux H, Noirot C, Thermes C, Rétaux S, Casane D. 2018. Evidence for late Pleistocene  
1248 origin of *Astyanax mexicanus* cavefish. *Bmc Evolutionary Biology* 18:43.
- 1249 Gal A, Orth U, Baehr W, Schwinger E, Rosenberg T. 1994. Heterozygous missense mutation in the rod  
1250 cGMP phosphodiesterase  $\beta$ -subunit gene in autosomal dominant stationary night blindness. *Nature*  
1251 *Genetics* 7:64-68.
- 1252 García-Machado E, Hernandez D, Garcia-Debras A, Chevalier-Monteagudo P, Metcalfe C, Bernatchez  
1253 L, Casane D. 2011. Molecular phylogeny and phylogeography of the Cuban cave-fishes of the genus  
1254 *Lucifuga*: evidence for cryptic allopatric diversity. *Mol Phylogenet Evol* 61:470-483.
- 1255 Grabherr MG, Haas BJ, Yassour M, Levin JZ, Thompson DA, Amit I, Adiconis X, Fan L, Raychowdhury R,  
1256 Zeng Q, et al. 2011. Full-length transcriptome assembly from RNA-Seq data without a reference  
1257 genome. *Nature Biotechnology* 29:644.
- 1258 Grantham R. 1974. Amino acid difference formula to help explain protein evolution. *Science* 185:862-  
1259 864.
- 1260 Gregory TR. 2019. Animal Genome Size. <http://www.genomesize.com>.
- 1261 Gross JB, Borowsky R, Tabin CJ. 2009. A novel role for Mc1r in the parallel evolution of  
1262 depigmentation in independent populations of the cavefish *Astyanax mexicanus*. *PLoS Genet*  
1263 5:e1000326.
- 1264 Gross JB, Weagley J, Stahl BA, Ma L, Espinasa L, McGaugh SE. 2017. A local duplication of the  
1265 Melanocortin receptor 1 locus in *Astyanax*. *Genome* 61:254-265.
- 1266 Hinaux H, Blin M, Fumey J, Legendre L, Heuze A, Casane D, Retaux S. 2015. Lens Defects in *Astyanax*  
1267 *mexicanus* Cavefish: Evolution of Crystallins and a Role for alphaA-Crystallin. *Developmental*  
1268 *Neurobiology* 75:505-521.
- 1269 Hoang DT, Chernomor O, von Haeseler A, Minh BQ, Vinh LS. 2018. UFBoot2: Improving the Ultrafast  
1270 Bootstrap Approximation. *Molecular Biology and Evolution* 35:518-522.
- 1271 Hoff KJ, Lange S, Lomsadze A, Borodovsky M, Stanke M. 2016. BRAKER1: Unsupervised RNA-Seq-  
1272 Based Genome Annotation with GeneMark-ET and AUGUSTUS. *Bioinformatics* 32:767-769.
- 1273 Holt C, Yandell M. 2011. MAKER2: an annotation pipeline and genome-database management tool  
1274 for second-generation genome projects. *BMC Bioinformatics* 12:491.
- 1275 Hunt M, Kikuchi T, Sanders M, Newbold C, Berriman M, Otto TD. 2013. REAPR: a universal tool for  
1276 genome assembly evaluation. *Genome Biology* 14:R47.
- 1277 Imanishi Y, Li N, Sokal I, Sowa ME, Lichtarge O, Wensel TG, Saperstein DA, Baehr W, Palczewski K.  
1278 2002. Characterization of retinal guanylate cyclase-activating protein 3 (GCAP3) from zebrafish to  
1279 man. *European Journal of Neuroscience* 15:63-78.

- 1280 Jones P, Binns D, Chang H-Y, Fraser M, Li W, McAnulla C, McWilliam H, Maslen J, Mitchell A, Nuka G,  
1281 et al. 2014. InterProScan 5: genome-scale protein function classification. *Bioinformatics* 30:1236-  
1282 1240.
- 1283 Kalyaanamoorthy S, Minh BQ, Wong TKF, von Haeseler A, Jermini LS. 2017. ModelFinder: fast model  
1284 selection for accurate phylogenetic estimates. *Nature Methods* 14:587-589.
- 1285 Kastenhuber E, Gesemann M, Mickoleit M, Neuhauss SCF. 2013. Phylogenetic analysis and expression  
1286 of zebrafish transient receptor potential melastatin family genes. *Developmental Dynamics*  
1287 242:1236-1249.
- 1288 Kim EB, Fang X, Fushan AA, Huang Z, Lobanov AV, Han L, Marino SM, Sun X, Turanov AA, Yang P, et al.  
1289 2011. Genome sequencing reveals insights into physiology and longevity of the naked mole rat.  
1290 *Nature* 479:223-227.
- 1291 Kimura T, Nagao Y, Hashimoto H, Yamamoto-Shiraishi Y-i, Yamamoto S, Yabe T, Takada S, Kinoshita  
1292 M, Kuroiwa A, Naruse K. 2014. Leucophores are similar to xanthophores in their specification and  
1293 differentiation processes in medaka. *Proceedings of the National Academy of Sciences of the United*  
1294 *States of America* 111:7343-7348.
- 1295 Kohany O, Gentles AJ, Hankus L, Jurka J. 2006. Annotation, submission and screening of repetitive  
1296 elements in Repbase: RepbaseSubmitter and Censor. *BMC Bioinformatics* 7:474.
- 1297 Krauss J, Frohnhöfer HG, Walderich B, Maischein H-M, Weiler C, Irion U, Nüsslein-Volhard C. 2014.  
1298 Endothelin signalling in iridophore development and stripe pattern formation of zebrafish. *Biology*  
1299 *Open* 3:503-509.
- 1300 Krauss J, Geiger-Rudolph S, Koch I, Nüsslein-Volhard C, Irion U. 2014. A dominant mutation in *tyrp1A*  
1301 leads to melanophore death in zebrafish. *Pigment Cell & Melanoma Research* 27:827-830.
- 1302 Kriventseva EV, Zdobnov EM, Simão FA, Ioannidis P, Waterhouse RM. 2015. BUSCO: assessing  
1303 genome assembly and annotation completeness with single-copy orthologs. *Bioinformatics* 31:3210-  
1304 3212.
- 1305 Lagman D, Callado-Pérez A, Franzén IE, Larhammar D, Abalo XM. 2015. Transducin Duplicates in the  
1306 Zebrafish Retina and Pineal Complex: Differential Specialisation after the Teleost Tetraploidisation.  
1307 *PLoS ONE* 10:e0121330.
- 1308 Lagman D, Franzén IE, Eggert J, Larhammar D, Abalo XM. 2016. Evolution and expression of the  
1309 phosphodiesterase 6 genes unveils vertebrate novelty to control photosensitivity. *Bmc Evolutionary*  
1310 *Biology* 16:124.
- 1311 Lahti DC, Johnson NA, Ajie BC, Otto SP, Hendry AP, Blumstein DT. 2009. Relaxed selection in the wild.  
1312 *Trends Ecol Evol* 24:487-496.
- 1313 Letunic I, Bork P. 2006. Interactive Tree Of Life (iTOL): an online tool for phylogenetic tree display and  
1314 annotation. *Bioinformatics* 23:127-128.
- 1315 Li H. 2011. A statistical framework for SNP calling, mutation discovery, association mapping and  
1316 population genetical parameter estimation from sequencing data. *Bioinformatics* 27:2987-2993.
- 1317 Li H, Durbin R. 2009. Fast and accurate short read alignment with Burrows-Wheeler transform.  
1318 *Bioinformatics* 25:1754-1760.
- 1319 Li W-H, Gojobori T, Nei M. 1981. Pseudogenes as a paradigm of neutral evolution. *Nature* 292:237-  
1320 239.
- 1321 Li W-H, Nei M. 1977. Persistence of Common Alleles in Two Related Populations or Species. *Genetics*  
1322 86:901-914.
- 1323 Li Y, Li G, Wang H, Du J, Yan J. 2013. Analysis of a Gene Regulatory Cascade Mediating Circadian  
1324 Rhythm in Zebrafish. *Plos Computational Biology* 9:e1002940.
- 1325 Lin J-J, Wang F-Y, Li W-H, Wang T-Y. 2017. The rises and falls of opsin genes in 59 ray-finned fish  
1326 genomes and their implications for environmental adaptation. *Scientific Reports* 7:15568.
- 1327 Lister JA. 2019. Larval but not adult xanthophore pigmentation in zebrafish requires GTP  
1328 cyclohydrolase 2 (*gch2*) function. *Pigment Cell & Melanoma Research* 0.
- 1329 Liu Z, Wen H, Hailer F, Dong F, Yang Z, Liu T, Han L, Shi F, Hu Y, Zhou J. 2019. Pseudogenization of  
1330 *Mc1r* gene associated with transcriptional changes related to melanogenesis explains leucistic

- 1331 phenotypes in *Oreonectes* cavefish (Cypriniformes, Nemacheilidae). *Journal of Zoological Systematics*  
1332 and *Evolutionary Research* 57:900-909.
- 1333 Lorin T, Brunet FG, Laudet V, Volff J-N. 2018. Teleost Fish-Specific Preferential Retention of  
1334 Pigmentation Gene-Containing Families After Whole Genome Duplications in Vertebrates. *G3:  
1335 Genes|Genomes|Genetics* 8:1795-1806.
- 1336 Luo R, Liu B, Xie Y, Li Z, Huang W, Yuan J, He G, Chen Y, Pan Q, Liu Y, et al. 2012. SOAPdenovo2: an  
1337 empirically improved memory-efficient short-read de novo assembler. *GigaScience* 1:18.
- 1338 Lynch M, Conery JS. 2000. The evolutionary fate and consequences of duplicate genes. *Science*  
1339 290:1151-1155.
- 1340 Lynch M, Kewalramani A. 2003. Messenger RNA Surveillance and the Evolutionary Proliferation of  
1341 Introns. *Molecular Biology and Evolution* 20:563-571.
- 1342 Ma L, Parkhurst A, Jeffery W. 2014. The role of a lens survival pathway including *sox2* and *alphaA-*  
1343 *crystallin* in the evolution of cavefish eye degeneration. *Evodevo* 5:28.
- 1344 Mackay DS, Boskovska OB, Knopf HLS, Lampi KJ, Shiels A. 2002. A Nonsense Mutation in *CRYBB1*  
1345 Associated with Autosomal Dominant Cataract Linked to Human Chromosome 22q. *American Journal  
1346 of Human Genetics* 71:1216-1221.
- 1347 Makino CL, Wen X-H, Olshevskaya EV, Peshenko IV, Savchenko AB, Dizhoor AM. 2012. Enzymatic  
1348 Relay Mechanism Stimulates Cyclic GMP Synthesis in Rod Photoresponse: Biochemical and  
1349 Physiological Study in Guanylyl Cyclase Activating Protein 1 Knockout Mice. *PLoS ONE* 7:e47637.
- 1350 Malmstrøm M, Matschiner M, Tørresen OK, Jakobsen KS, Jentoft S. 2017. Whole genome sequencing  
1351 data and de novo draft assemblies for 66 teleost species. *Scientific data* 4:160132.
- 1352 Mao H, Wang H. 2017. SINE\_scan: an efficient tool to discover short interspersed nuclear elements  
1353 (SINEs) in large-scale genomic datasets. *Bioinformatics* 33:743-745.
- 1354 Matveev AV, Quiambao AB, Fitzgerald JB, Ding XQ. 2008. Native cone photoreceptor cyclic  
1355 nucleotide-gated channel is a heterotetrameric complex comprising both *CNGA3* and *CNGB3*: a study  
1356 using the cone-dominant retina of *Nrl*<sup>-/-</sup> mice. *Journal of Neurochemistry* 106:2042-2055.
- 1357 McGaugh SE, Gross JB, Aken B, Blin M, Borowsky R, Chalopin D, Hinaux H, Jeffery WR, Keene A, Ma L,  
1358 et al. 2014. The cavefish genome reveals candidate genes for eye loss. *Nat Commun* 5:5307.
- 1359 McLaughlin ME, Sandberg MA, Berson EL, Dryja TP. 1993. Recessive mutations in the gene encoding  
1360 the  $\beta$ -subunit of rod phosphodiesterase in patients with *retinitis pigmentosa*. *Nature Genetics* 4:130-  
1361 134.
- 1362 Meredith RW, Gatesy J, Murphy WJ, Ryder OA, Springer MS. 2009. Molecular Decay of the Tooth  
1363 Gene *Enamelin* (*ENAM*) Mirrors the Loss of Enamel in the Fossil Record of Placental Mammals. *Plos  
1364 Genetics* 5:e1000634.
- 1365 Miyata T, Yasunaga T. 1981. Rapidly evolving mouse alpha-globin-related pseudo gene and its  
1366 evolutionary history. *Proceedings of the National Academy of Sciences* 78:450-453.
- 1367 Morgulis A, Gertz EM, Schäffer AA, Agarwala R. 2006. A Fast and Symmetric DUST Implementation to  
1368 Mask Low-Complexity DNA Sequences. *Journal of Computational Biology* 13:1028-1040.
- 1369 Nguyen L-T, Schmidt HA, von Haeseler A, Minh BQ. 2015. IQ-TREE: A Fast and Effective Stochastic  
1370 Algorithm for Estimating Maximum-Likelihood Phylogenies. *Molecular Biology and Evolution* 32:268-  
1371 274.
- 1372 Nishiwaki Y, Komori A, Sagara H, Suzuki E, Manabe T, Hosoya T, Nojima Y, Wada H, Tanaka H,  
1373 Okamoto H, et al. 2008. Mutation of cGMP phosphodiesterase 6 $\alpha$ -subunit gene causes progressive  
1374 degeneration of cone photoreceptors in zebrafish. *Mechanisms of Development* 125:932-946.
- 1375 Nord H, Dennhag N, Muck J, von Hofsten J. 2016. *Pax7* is required for establishment of the  
1376 xanthophore lineage in zebrafish embryos. *Molecular biology of the cell* 27:1853-1862.
- 1377 Osawa S, Weiss ER editors. *Retinal Degenerative Diseases*. 2012 Boston, MA.
- 1378 Parichy DM, Ransom DG, Paw B, Zon LI, Johnson SL. 2000. An orthologue of the kit-related gene *fms*  
1379 is required for development of neural crest-derived xanthophores and a subpopulation of adult  
1380 melanocytes in the zebrafish, *Danio rerio*. *Development* 127:3031.
- 1381 Parichy DM, Spiewak JE. 2015. Origins of adult pigmentation: diversity in pigment stem cell lineages  
1382 and implications for pattern evolution. *Pigment Cell & Melanoma Research* 28:31-50.

- 1383 Pejaver V, Urresti J, Lugo-Martinez J, Pagel KA, Lin GN, Nam H-J, Mort M, Cooper DN, Sebat J,  
1384 lakoucheva LM, et al. 2017. MutPred2: inferring the molecular and phenotypic impact of amino acid  
1385 variants. *bioRxiv*:134981.
- 1386 Pelletier I, Bally-Cuif L, Ziegler I. 2001. Cloning and developmental expression of zebrafish GTP  
1387 cyclohydrolase I. *Mechanisms of Development* 109:99-103.
- 1388 Protas ME, Hersey C, Kochanek D, Zhou Y, Wilkens H, Jeffery WR, Zon LI, Borowsky R, Tabin CJ. 2006.  
1389 Genetic analysis of cavefish reveals molecular convergence in the evolution of albinism. *Nat Genet*  
1390 38:107-111.
- 1391 Quinlan AR, Hall IM. 2010. BEDTools: a flexible suite of utilities for comparing genomic features.  
1392 *Bioinformatics* 26:841-842.
- 1393 Räscho N, Scholten A, Koch K-W. 2009. Expression profiles of three novel sensory guanylate cyclases  
1394 and guanylate cyclase-activating proteins in the zebrafish retina. *Biochimica et Biophysica Acta (BBA)*  
1395 - *Molecular Cell Research* 1793:1110-1114.
- 1396 Renninger SL, Gesemann M, Neuhauss SCF. 2011. Cone arrestin confers cone vision of high temporal  
1397 resolution in zebrafish larvae. *European Journal of Neuroscience* 33:658-667.
- 1398 Sato M, Nakazawa M, Usui T, Tanimoto N, Abe H, Ohguro H. 2005. Mutations in the gene coding for  
1399 guanylate cyclase-activating protein 2 (GUCA1B gene) in patients with autosomal dominant retinal  
1400 dystrophies. *Graefes Archive for Clinical and Experimental Ophthalmology* 243:235-242.
- 1401 Schonthaler HB, Lampert JM, Isken A, Rinner O, Mader A, Gesemann M, Oberhauser V, Golczak M,  
1402 Biehlmaier O, Palczewski K, et al. 2007. Evidence for RPE65-independent vision in the cone-  
1403 dominated zebrafish retina. *The European journal of neuroscience* 26:1940-1949.
- 1404 Simon N, Fujita S, Porter M, Yoshizawa M. 2019. Expression of extraocular opsin genes and light-  
1405 dependent basal activity of blind cavefish. *PeerJ* 7:e8148.
- 1406 Slater GSC, Birney E. 2005. Automated generation of heuristics for biological sequence comparison.  
1407 *BMC Bioinformatics* 6:31.
- 1408 Smit AFA, Hubley R. 2008. RepeatModeler Open 1.0. <http://www.repeatmasker.org>.
- 1409 Smit AFA, Hubley R, Green P. 2013. RepeatMasker Open 4.0. <http://www.repeatmasker.org>.
- 1410 Stearns G, Evangelista M, Fadool JM, Brockerhoff SE. 2007. A mutation in the cone-specific *pde6* gene  
1411 causes rapid cone photoreceptor degeneration in zebrafish. *The Journal of Neuroscience* 27:13866 –  
1412 13874.
- 1413 Takahashi JS, Hong H-K, Ko CH, McDearmon EL. 2008. The genetics of mammalian circadian order  
1414 and disorder: implications for physiology and disease. *Nature Reviews Genetics* 9:764-775.
- 1415 Thanos S, Böhm MRR, Meyer zu Hörste M, Prokosch-Willing V, Hennig M, Bauer D, Heiligenhaus A.  
1416 2014. Role of crystallins in ocular neuroprotection and axonal regeneration. *Progress in Retinal and*  
1417 *Eye Research* 42:145-161.
- 1418 Trapnell C, Williams BA, Pertea G, Mortazavi A, Kwan G, van Baren MJ, Salzberg SL, Wold BJ, Pachter  
1419 L. 2010. Transcript assembly and quantification by RNA-Seq reveals unannotated transcripts and  
1420 isoform switching during cell differentiation. *Nature Biotechnology* 28:511-515.
- 1421 Vatine G, Vallone D, Gothilf Y, Foulkes NS. 2011. It's time to swim! Zebrafish and the circadian clock.  
1422 *FEBS Letters* 585:1485-1494.
- 1423 Vincent A, Audo I, Tavares E, Maynes Jason T, Tumber A, Wright T, Li S, Michiels C, Banin E, Bocquet  
1424 B, et al. 2016. Biallelic Mutations in *GNB3* Cause a Unique Form of Autosomal-Recessive Congenital  
1425 Stationary Night Blindness. *The American Journal of Human Genetics* 98:1011-1019.
- 1426 Vurture GW, Sedlazeck FJ, Nattestad M, Underwood CJ, Fang H, Gurtowski J, Schatz MC. 2017.  
1427 GenomeScope: fast reference-free genome profiling from short reads. *Bioinformatics* 33:2202-2204.
- 1428 Wada Y, Sugiyama J, Okano T, Fukada Y. 2006. GRK1 and GRK7: Unique cellular distribution and  
1429 widely different activities of opsin phosphorylation in the zebrafish rods and cones. *Journal of*  
1430 *Neurochemistry* 98:824-837.
- 1431 Wasfy MM, Matsui JI, Miller J, Dowling JE, Perkins BD. 2014. myosin 7aa<sup>-/-</sup> mutant zebrafish show  
1432 mild photoreceptor degeneration and reduced electroretinographic responses. *Experimental Eye*  
1433 *Research* 122:65-76.

- 1434 Wertheim JO, Murrell B, Smith MD, Kosakovsky Pond SL, Scheffler K. 2015. RELAX: Detecting Relaxed  
1435 Selection in a Phylogenetic Framework. *Molecular Biology and Evolution* 32:820-832.
- 1436 Xiao H, Chen S-y, Liu Z-m, Zhang R-d, Li W-x, Zan R-g, Zhang Y-p. 2005. Molecular phylogeny of  
1437 *Sinocyclocheilus* (Cypriniformes: Cyprinidae) inferred from mitochondrial DNA sequences. *Molecular*  
1438 *Phylogenetics and Evolution* 36:67-77.
- 1439 Yang J, Chen X, Bai J, Fang D, Qiu Y, Jiang W, Yuan H, Bian C, Lu J, He S, et al. 2016. The  
1440 *Sinocyclocheilus* cavefish genome provides insights into cave adaptation. *BMC Biol* 14:1-13.
- 1441 Yang Z. 2007. PAML 4: Phylogenetic Analysis by Maximum Likelihood. *Molecular Biology and*  
1442 *Evolution* 24:1586-1591.
- 1443 Yuan J, He Z, Yuan X, Jiang X, Sun X, Zou S. 2010. Speciation of polyploid Cyprinidae fish of common  
1444 carp, crucian carp, and silver crucian carp derived from duplicated Hox genes. *Journal of*  
1445 *Experimental Zoology Part B: Molecular and Developmental Evolution* 314B:445-456.
- 1446 Zang J, Keim J, Kastenhuber E, Gesemann M, Neuhauss SCF. 2015. Recoverin depletion accelerates  
1447 cone photoresponse recovery. *Open Biology* 5.
- 1448 Zhao H, Di Mauro G, Lungu-Mitea S, Negrini P, Guarino AM, Frigato E, Braunbeck T, Ma H, Lamparter  
1449 T, Vallone D, et al. 2018. Modulation of DNA Repair Systems in Blind Cavefish during Evolution in  
1450 Constant Darkness. *Current Biology* 28:3229-3243.
- 1451 Zhao H, Yang J-R, Xu H, Zhang J. 2010. Pseudogenization of the Umami Taste Receptor Gene *Tas1r1* in  
1452 the Giant Panda Coincided with its Dietary Switch to Bamboo. *Molecular Biology and Evolution*  
1453 27:2669-2673.
- 1454
- 1455

1456 Legends

1457

1458 **Fig. 1.** Gene sets. (A) Eye genes. (B) Circadian clock genes. (C) Pigmentation genes. Genes  
1459 were colored according to the species in which LoF mutations were found (species name  
1460 followed by \* indicate that no genome was available but pseudogenes were identified). Genes  
1461 with a hatched background are under/not expressed in at least one cavefish species. Genes  
1462 expressed only in the eyes are surrounded by blue lines and opsins by an orange line.  
1463 Pigmentation genes were clustered according to Lorin et al. 2018. Genes belonging to several  
1464 subsets are surrounded by dotted lines with links between the different subsets.

1465

1466 **Fig. 2.** Phylogeny of the cavefishes and some close relatives.

1467

1468 **Fig. 3.** Mapping of LoF mutations. For *Sinocyclocheilus* species, the number of genes for  
1469 which both ohnologs are pseudogenized is given between brackets.

1470

1471 **Fig. 4.** Distribution of different categories of LoF mutations. (A) Position of internal stop  
1472 codons and frameshifts along coding sequences. (B) Observed and expected frequencies. (C)  
1473 Distribution of indel size.

1474

1475 **Fig. 5.** Observed and expected distributions of LoF mutations per gene. (A) *L. dentate*. (B) *L.*  
1476 *gibarensis*. Red line: observed distribution. The expected distributions were obtained using an  
1477 analytical model (dots) and 10,000 simulations (histograms).

1478

1479 **Fig. 6.** Distribution of  $\omega$  in surface and cave fishes. (A) Eye genes. (B) Circadian clock genes.  
1480 (C) Pigmentation genes.

1481

1482 **Fig. 7.** Distributions of MutPred2 scores in several fish lineages and in simulations of  
1483 substitutions without selection. The number of substitutions in each lineage is given between  
1484 parenthesis. One hundred simulations were performed with each gene set. In each simulation  
1485 54 non-synonymous mutations were generated in eye genes, 36 in circadian clock genes and  
1486 232 in pigmentation genes, those numbers corresponding to the numbers of non-synonymous  
1487 mutations found in *Astyanax mexicanus* cavefish.

1488

1489 **Fig. 8.** Probability of finding 19 eye pseudogenes in *L. dentata* according to the time of  
1490 neutral evolution. Red and pink lines: based on an analytical model assuming 76 and 50  
1491 neutral genes respectively; other lines: estimations based on 10,000 simulations, assuming 76  
1492 neutral genes and taking into account the length and number of introns in each eye genes and  
1493 considering different effective population sizes. The number of generations for which the  
1494 highest probability was found is reported above each line.

1495

1496 **Fig. 9.** Comparison of eye gene decay in cavefishes vs fossorial mammals.  
1497 (A) Venn diagram showing the genes carrying LoF mutations in both groups. For each gene,  
1498 the number of LoF mutations found in each species is indicated. (B) Distribution of the  
1499 number of LoF mutations per pseudogene. The distribution was computed with only the  
1500 pseudogenes found in both groups or with all pseudogenes (inset). Genes present as one copy  
1501 in fossorial mammals are often duplicated in *L. dentata* and quadruplicated in *S. anshuiensis*,  
1502 after one and two WGD respectively. Other gene duplications also sporadically increased the  
1503 number of paralogs in these fishes. The number of LoF mutations found in these paralogs are  
1504 separated by vertical lines.

1505



1506 **Table1.** Estimations of the time without selection on eye genes in *Lucifuga dentata*.

1507

1508 **Fig. S1.** Photos of the specimens used for genome sequencing. (A) *Lucifuga dentate*. (B)

1509 *Lucifuga gibarensis*.

1510

1511 **Fig. S2.** *L. dentata* scaffold size distribution. Based on 3,537 scaffolds longer than 50kb

1512 (49,407 scaffolds < 50 kb not used).

1513

1514 **Fig. S3.** BUSCO analyses using the Actinopterygii gene database (v3.1.0). We assessed the

1515 completeness of three published Ophidiiformes genomes (*Brotula barbata*, *Carapus acus* and

1516 *Lamprogrammus exutus*), *Lucifuga dentata* genome, gene models resulting from the

1517 annotation pipeline and transcriptome assembly.

1518

1519 **Fig. S4.** Transcriptome statistics. We followed the transcriptome assembly quality assessment

1520 of Trinity (<https://github.com/trinityrnaseq/trinityrnaseq/wiki/Transcriptome-Assembly->

1521 [Quality-Assessment](https://github.com/trinityrnaseq/trinityrnaseq/wiki/Transcriptome-Assembly-)).

1522

1523 **Fig. S5.** Genome annotation pipeline used on the *Lucifuga dentata* draft genome.

1524

1525 **Fig. S6.** Interspersed repeat landscape of *Lucifuga dentata*.

1526

1527 **Fig. S7.** List of eye genes retrieved from cavefishes and related species. Colors represent the

1528 type of LoF mutation. When higher than one, the number of LoF mutations is also reported.

1529

1530 **Fig. S8.** A large deletion between GNL3L and SWS2 at the origin of LWS gene loss in  
1531 Ophidiiformes. This figure was generated using SimpleSynteny (Veltri D., Malapi-Wight M.  
1532 and Crouch J.A. SimpleSynteny: a web-based tool for visualization of microsynteny across  
1533 multiple species. *Nucleic Acids Research* 44(W1):W41-W45, 2016, doi:10.1093/nar/gkw330).

1534

1535 **Fig. S9.** Distribution of the effective segment size generated by random insertion of STOP  
1536 codons and frameshifts (100,000 simulations).

1537

1538 **Fig. S10.** Frameshift size distribution for each dataset.

1539

1540 **Fig. S11.** Observed and theoretical frequencies of different types of LoF mutations in three  
1541 gene sets, and the frequency of different types of mutations found in eye genes of fossorial  
1542 mammals (Emerling CA, Springer MS. 2014. Eyes underground: Regression of visual protein  
1543 networks in subterranean mammals. *Molecular Phylogenetics and Evolution* 78:260-270).

1544

1545 **Fig. S12.** (A) Number of difference per gene between *Astyanax mexicanus* morphs and  
1546 between *Lucifuga dentata* and *Lucifuga gibarensis*. (B) Estimation of  $\omega$  for each eye gene.

1547 Grey lines represent values of  $d_n$  or  $d_s < 0.01$ , leading to non-reliable estimations of  $\omega$ .

1548

1549 **Fig. S13.** Estimations of  $\omega$  with concatenated sequences. Branch colors are scaled depending  
1550 on the  $\omega$  values. Trees were generated using ggtree (Yu, G., Smith, D.K., Zhu, H., Guan, Y.  
1551 and Lam, T.T.-Y. (2017), ggtree: an R package for visualization and annotation of  
1552 phylogenetic trees with their covariates and other associated data. *Methods Ecol Evol*, 8: 28-  
1553 36. doi:10.1111/2041-210X.12628).

1554

1555 **Fig. S14.** RELAX results with species assigned as test branch for eye genes. The k parameter  
1556 and p-value are displayed along with  $\omega$  plots.

1557

1558 **Fig. S15.** RELAX results with species assigned as test branch for circadian clock genes. The k  
1559 parameter and p-value are displayed along with  $\omega$  plots.

1560

1561 **Fig. S16.** RELAX results with species assigned as test branch for pigmentation genes. The k  
1562 parameter and p-value are displayed along with  $\omega$  plots.

1563

1564 **Fig. S17.** Empirical cumulative distributions of MutPred2 scores. The number of scores is  
1565 indicated between parenthesis. 100 neutral simulations were performed for each dataset with  
1566 54 random non synonymous mutations in eye genes, 36 in circadian clock genes and 232 in  
1567 pigmentation genes, which are the number of non-synonymous mutations found in *Astyanax*  
1568 *mexicanus* cavefish. The statistical significance of the difference between each pair of  
1569 distributions was assessed using the Kolmogorov-Smirnov test (significant differences are  
1570 shown on a red background whereas non-significant differences are shown on a green  
1571 background).

1572

1573 **Fig. S18.** Empirical cumulative distributions of Grantham's distances. The number of  
1574 distances is indicated between parenthesis. 100 neutral simulations were performed for each  
1575 dataset with 54 random non synonymous mutations in eye genes, 36 in circadian clock genes  
1576 and 232 in pigmentation genes which are the number of non-synonymous mutations found in  
1577 *Astyanax mexicanus* cavefish. The statistical significance of the difference between each pair  
1578 of distributions was assessed using the Kolmogorov-Smirnov test (significant differences are

1579 shown on a red background whereas non-significant differences are shown on a green  
1580 background).

1581

1582 **Fig. S19.** Effect of the Transition/Transversion ratio on the cumulative distribution of  
1583 MutPred2 scores in simulated amino acid substitutions.

1584

1585 **Fig. S20.** Fit of mixture distributions of MutPred2 scores with the distributions found in two  
1586 *Lucifuga* spp. and two *Astyanax mexicanus* morphs. The p-values of Kolomogorv-Smirnov  
1587 tests between the observed distributions in each species and mixture distributions were plotted  
1588 according to different proportions of mutations that reached fixation under relaxed selection.

1589

1590 **Fig. S21.** Distributions of MutPred2 scores in three *Sinocyclocheilus* species, *Danio rerio*  
1591 and in simulations of substitutions without selection. The number of substitutions in each  
1592 lineage is given between parenthesis. One hundred simulations were performed with each  
1593 gene set. In each simulation 54 non-synonymous mutations were generated in eye genes, 36 in  
1594 circadian clock genes and 232 in pigmentation genes, those numbers corresponding to the  
1595 numbers of non-synonymous mutations found in *Astyanax mexicanus* cavefish.

1596

1597 **Fig. S22.** Fit of mixture distributions of MutPred2 scores with the distributions found in three  
1598 *Sinocyclocheilus* species. The p-values of Kolomogorv-Smirnov tests between the observed  
1599 distributions in each species and mixture distributions were plotted according to different  
1600 proportions of mutations that reached fixation under relaxed selection.

1601

1602 **Table S1.** List of LoF mutations found in *Lucifuga dentata* and *Lucifuga gibarensis* genomes,  
1603 and their coverage. LoF mutations in red were also found in the transcriptome of *L. dentata*.

1604

1605 **Data\_Supp1.** Summary of the number of genes retrieved from each species and for each gene  
1606 set, along with the number of pseudogenes and the number of LoF mutations.

1607

1608 **Data\_Supp2.** Sequences predicted with exonerate and ID of sequences retrieved from  
1609 Ensembl.

1610

1611 **Data\_Supp3.** Results obtained with different methods for dating relaxed selection on eye  
1612 genes in *Lucifuga dentata*.

1613

1614 Description of Supplementary files content:

1615 Divergence\_values: Pairwise nucleotidic distances between species for each gene set.

1616 Lucifuga\_Supplementary\_files\_Genome: Original GFF3 file with functional annotations and  
1617 scaffolds smaller than 200 bp not uploaded to NCBI.

1618 MutPred2\_Results: Raw output of MutPred2. Parsed results files to be used with the script  
1619 provided in github (MutPred2\_Script.R) are also provided.

1620 Phylogenies: Gene phylogenies computed with iQTree and displayed with iTOL. The model  
1621 used for each phylogeny can be found on the “Models” folder.

1622 Concatenated\_Alignments: Concatenated alignments for vision, circadian and pigmentation  
1623 genes.

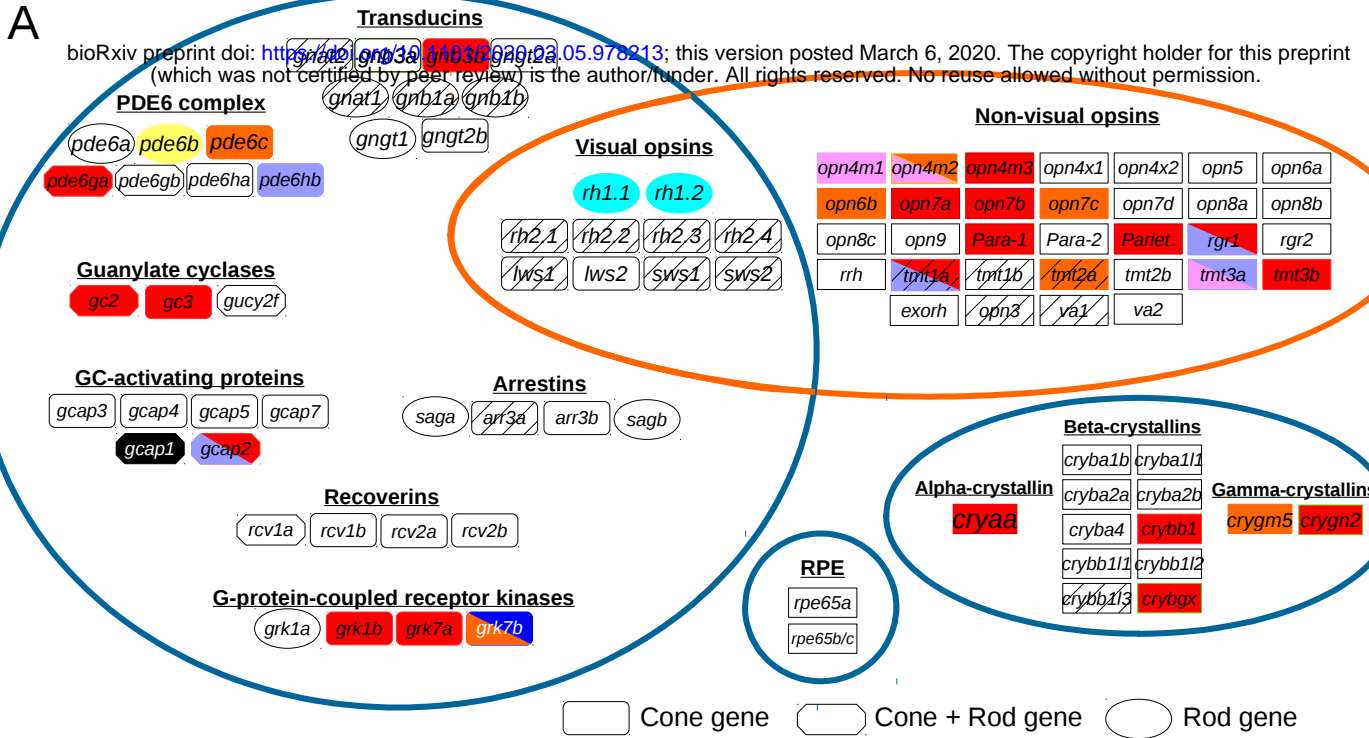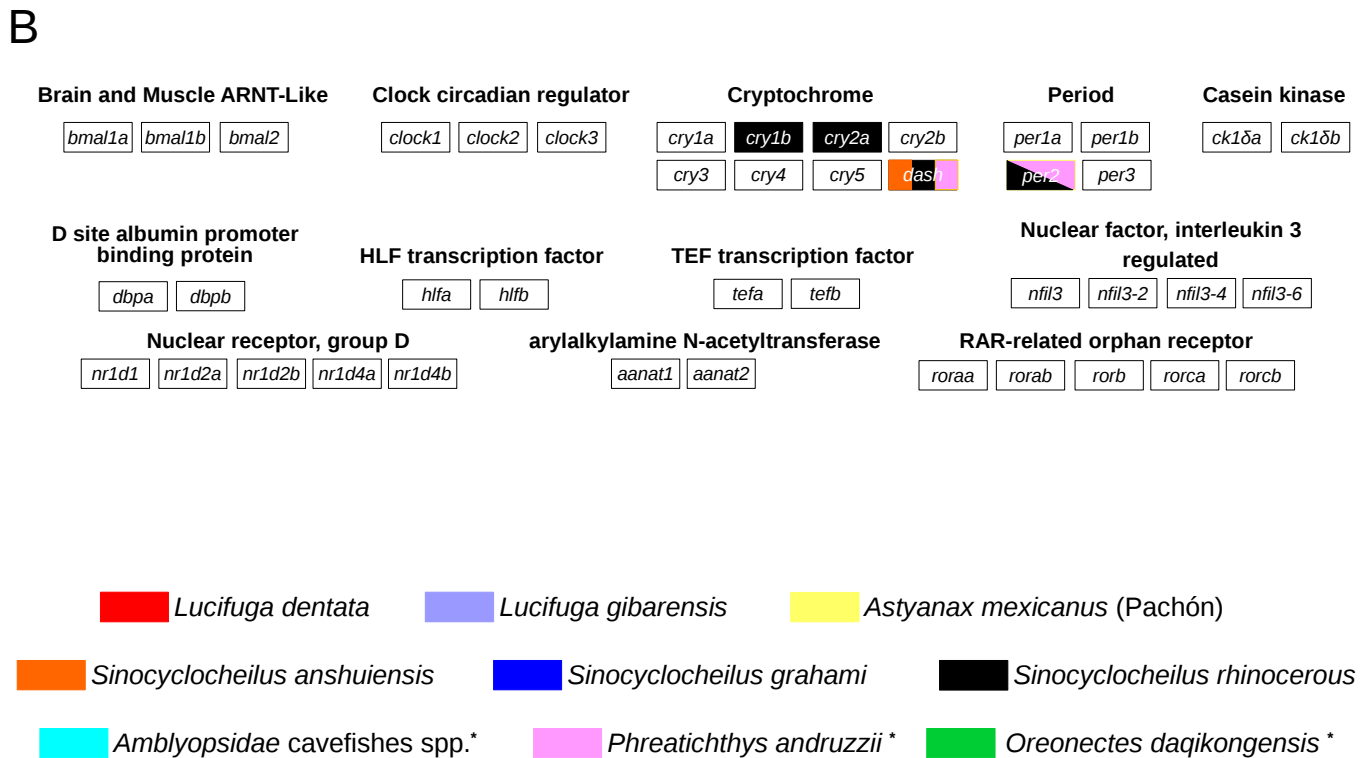



-  eyes
-  small eyes
-  no eyes
-  WGD

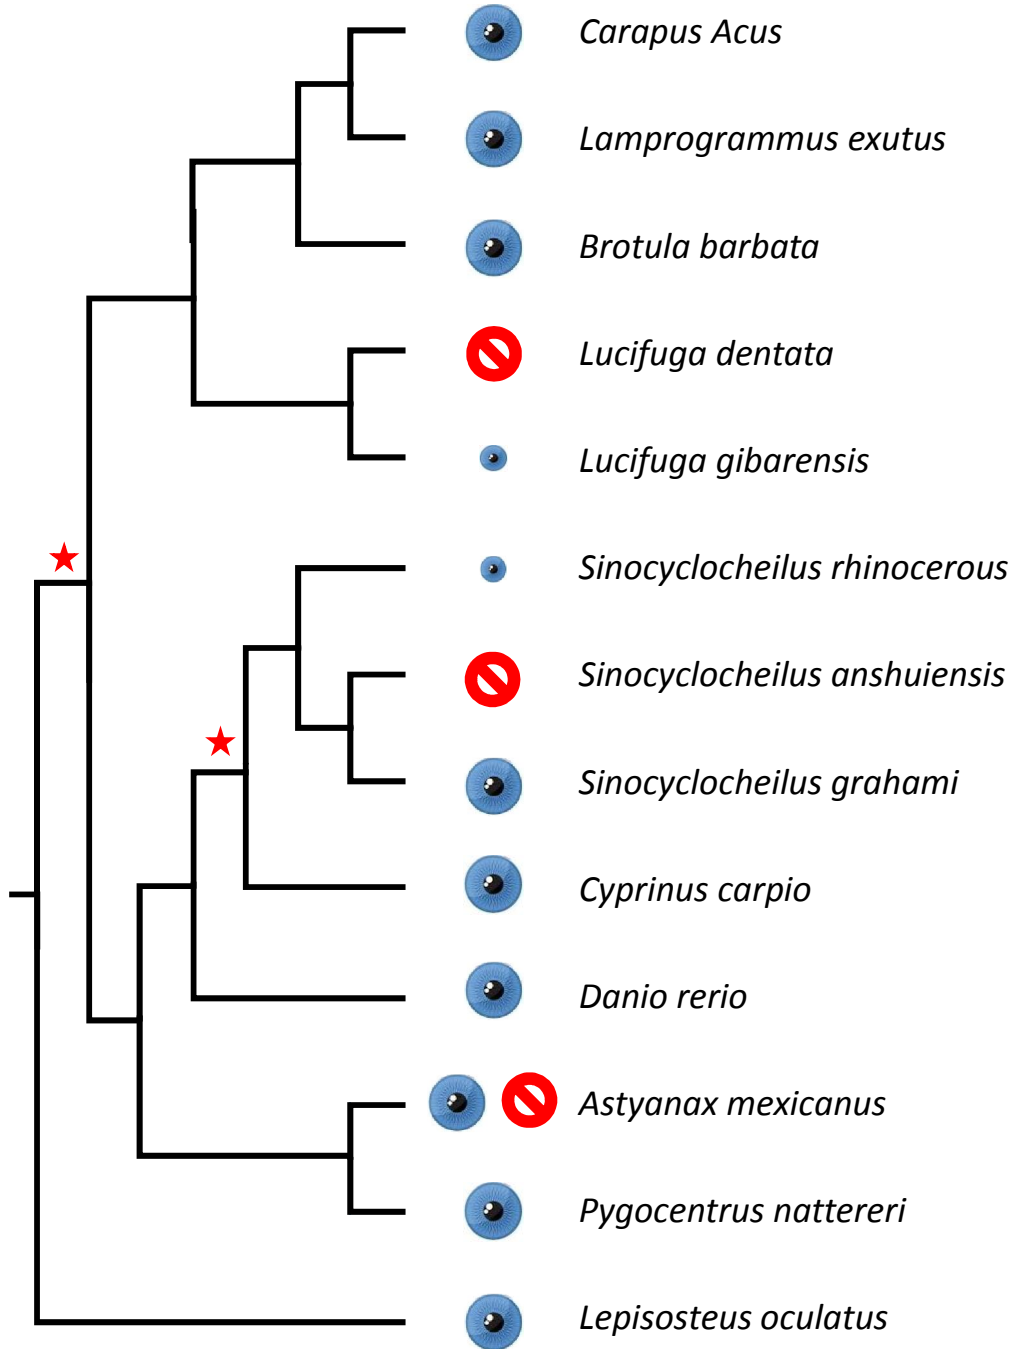



A

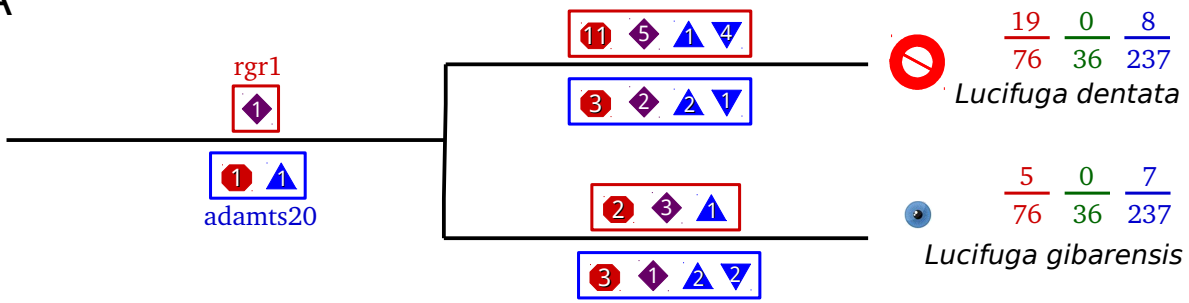

B

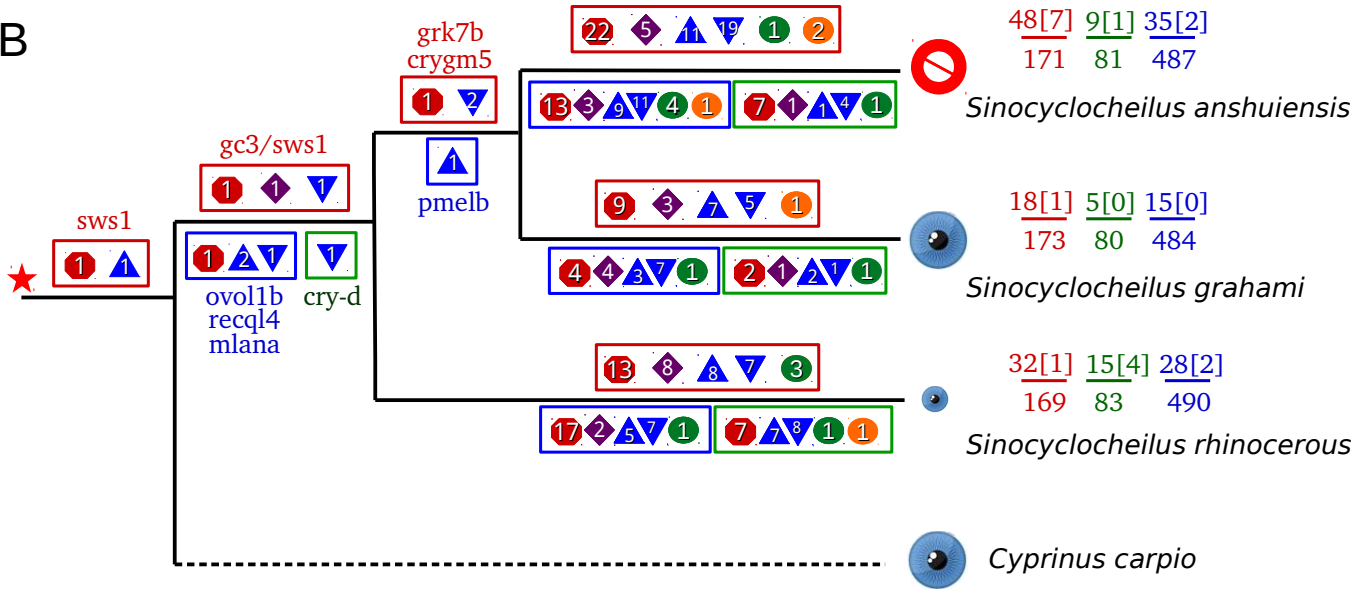

C

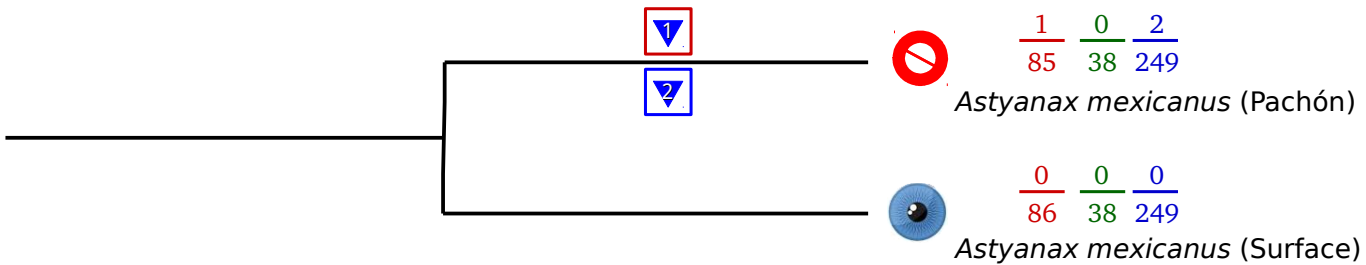

● Gain of stop codon

▲ Insertion

● Loss of start codon

◆ Splice site mutation

▼ Deletion

● Loss of stop codon

▭ Vision

▭ Pigmentation

▭ Circadian clock

$\frac{\text{Number of pseudogenes}}{\text{Number of genes}}$

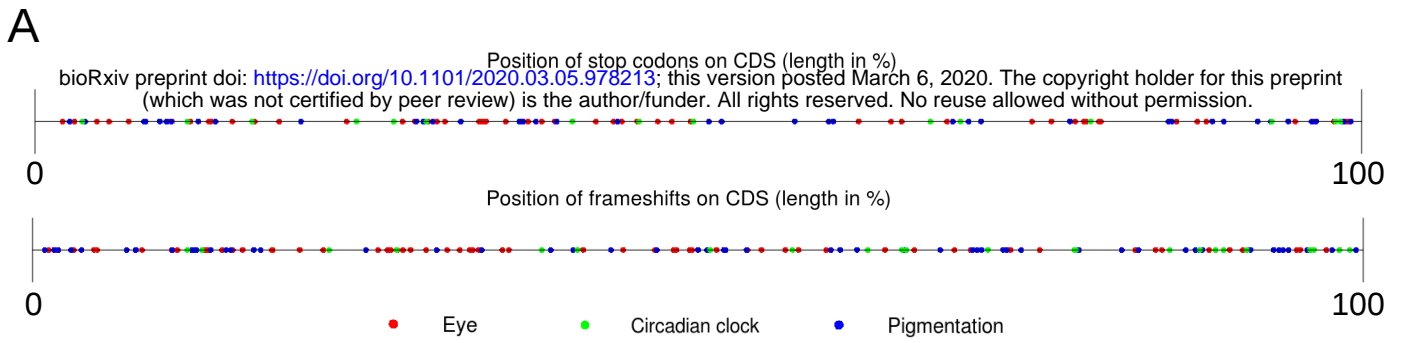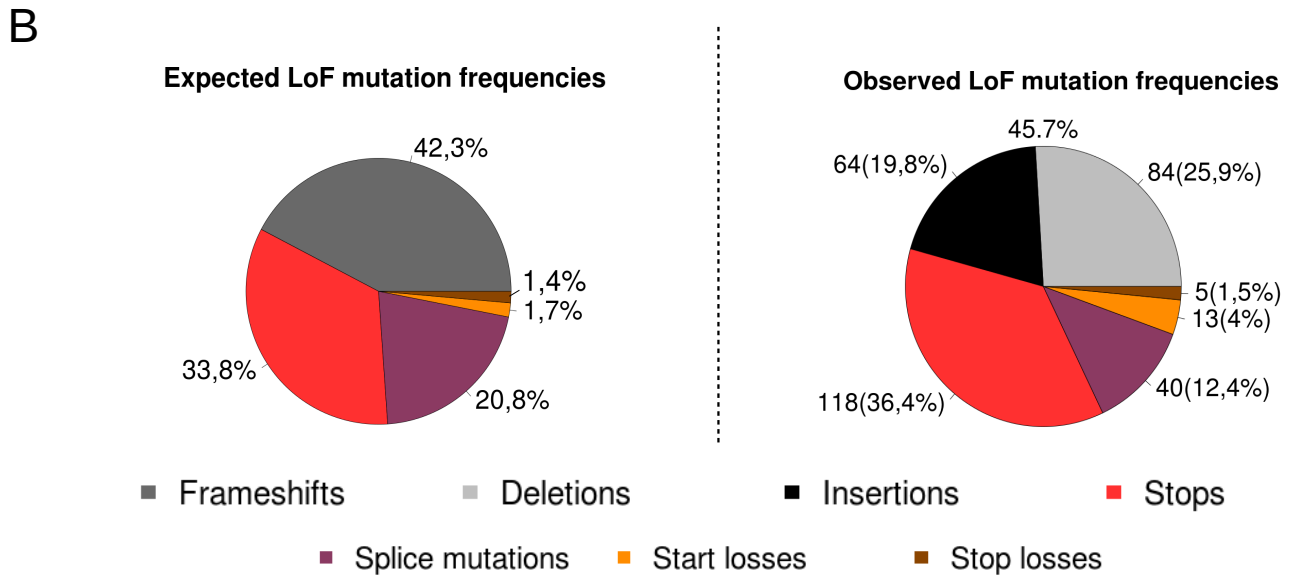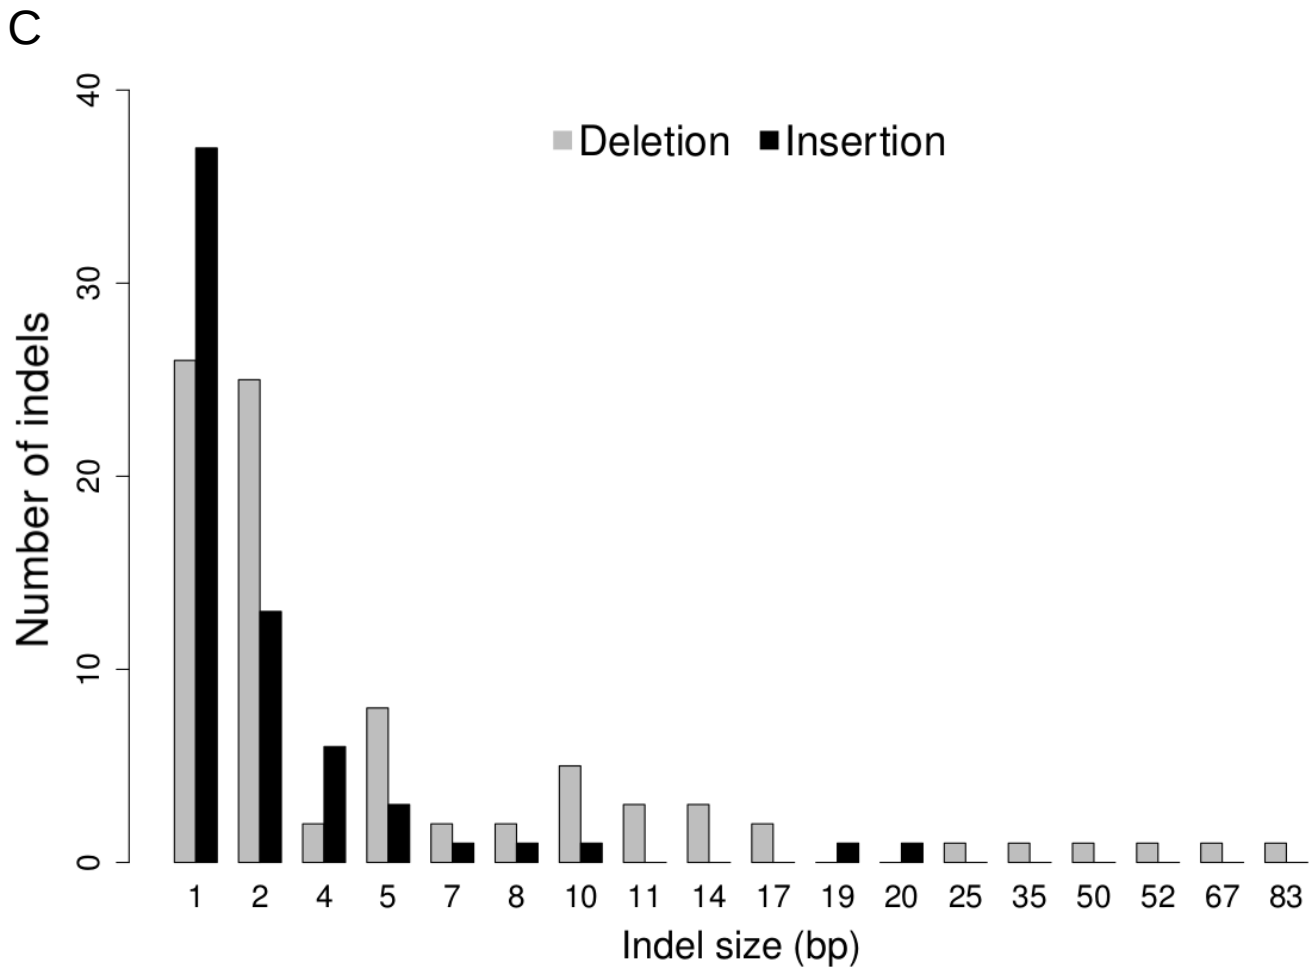

# Distribution of the number of LoF mutations per gene

bioRxiv preprint doi: <https://doi.org/10.1101/2020.03.05.978213>; this version posted March 6, 2020. The copyright holder for this preprint (which was not certified by peer review) is the author/funder. All rights reserved. No reuse allowed without permission.

A

## *Lucifuga dentata*

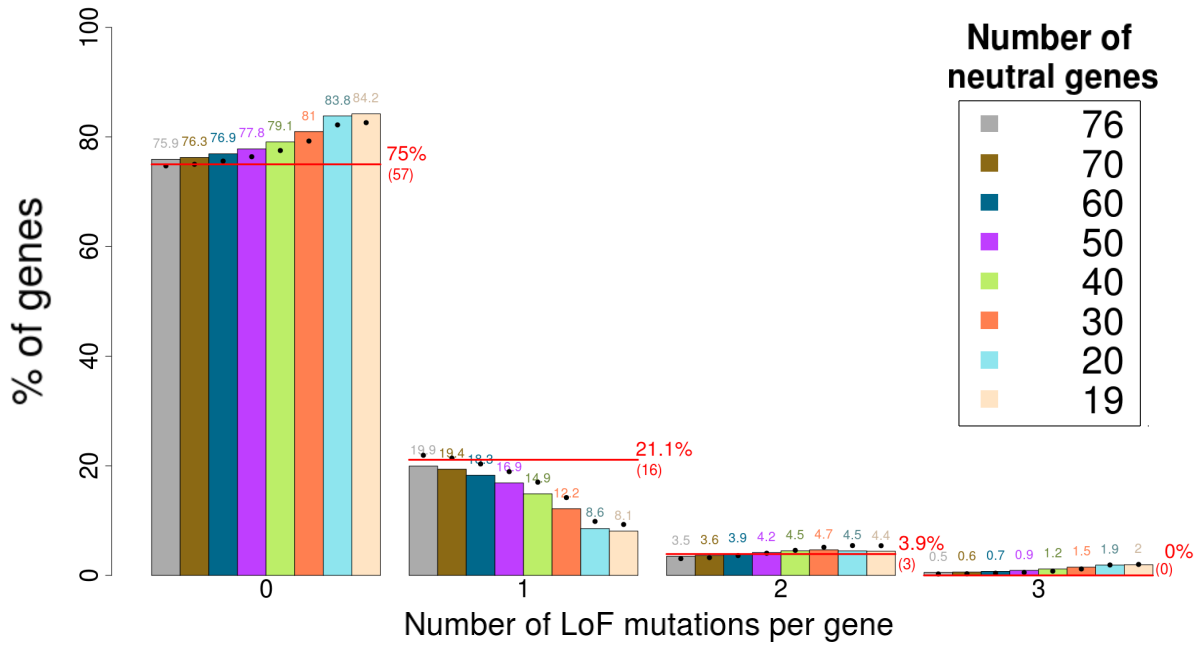

B

## *Lucifuga gibarensis*

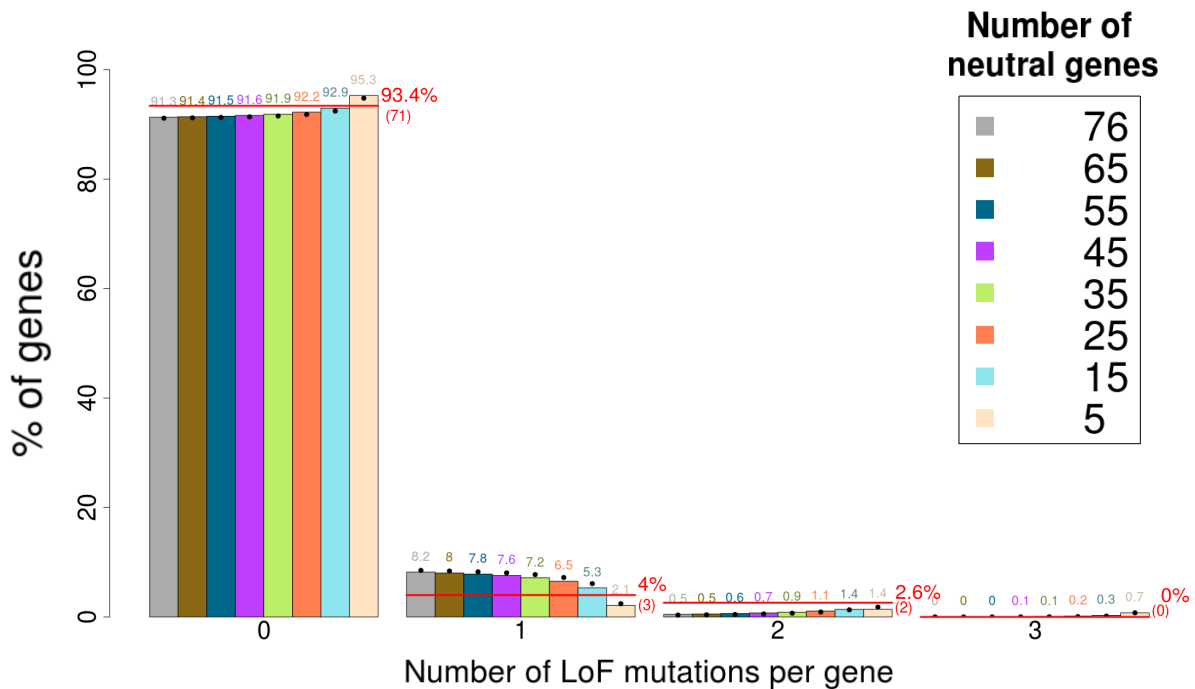

A

## Eye genes

bioRxiv preprint doi: <https://doi.org/10.1101/2020.03.05.978213>; this version posted March 6, 2020. The copyright holder for this preprint (which was not certified by peer review) is the author/funder. All rights reserved. No reuse allowed without permission.

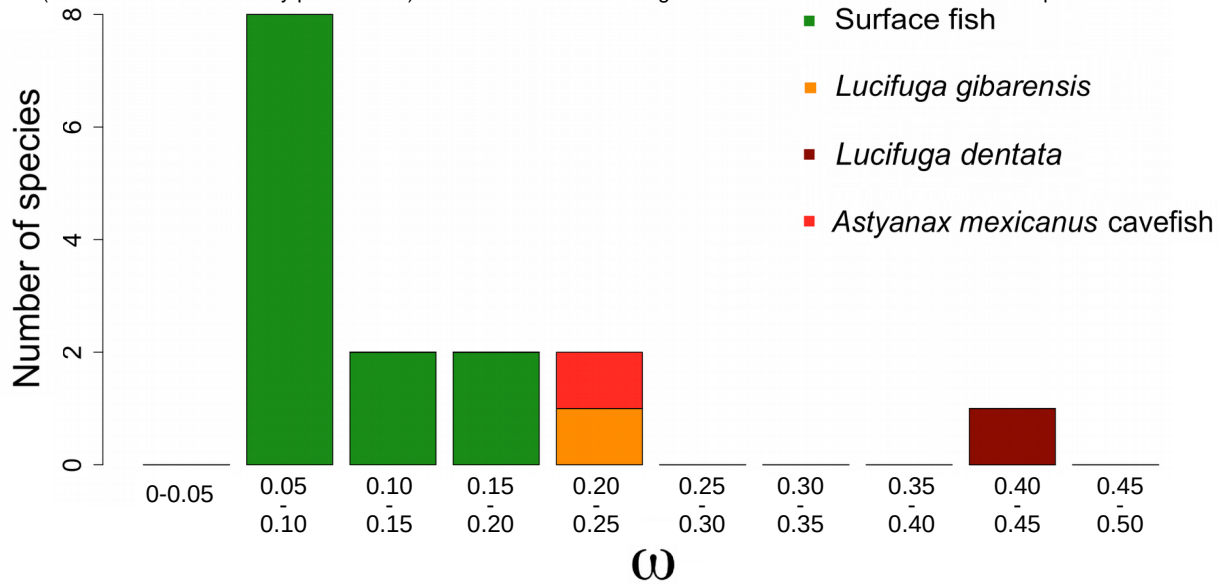

B

## Circadian clock genes

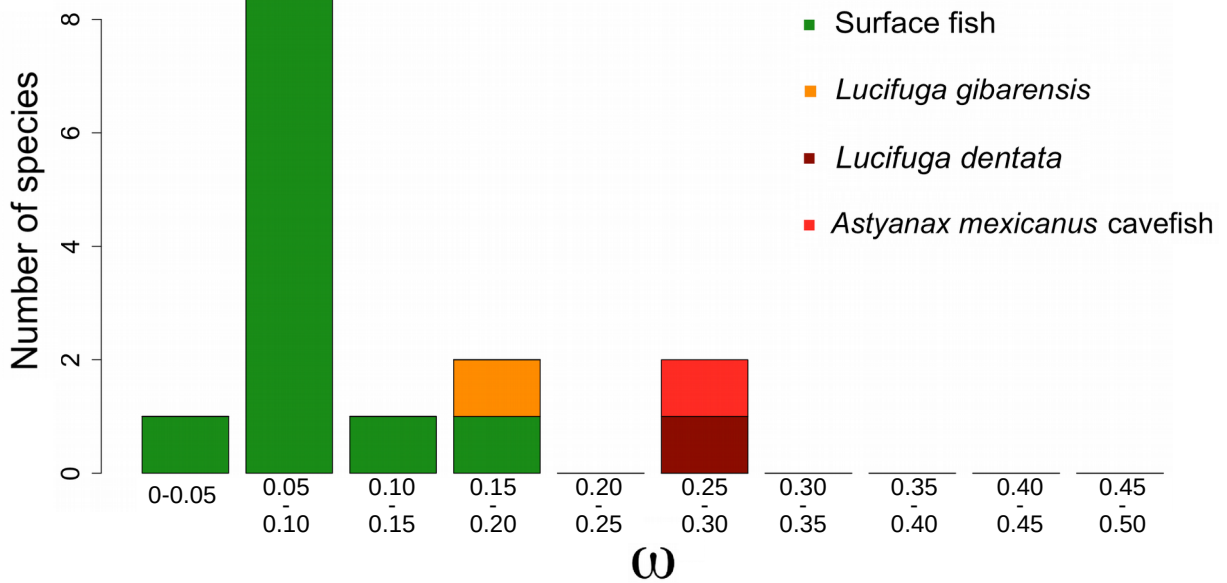

C

## Pigmentation genes

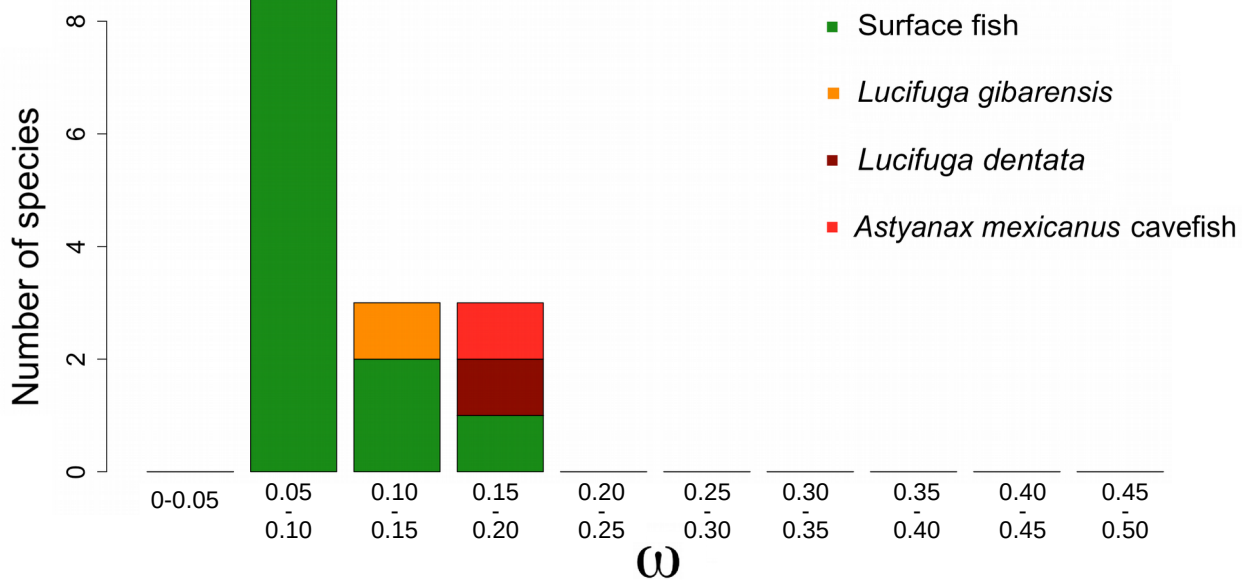

A

## Eye genes

bioRxiv preprint doi: <https://doi.org/10.1101/2020.03.05.978213>; this version posted March 6, 2020. The copyright holder for this preprint (which was not certified by peer review) is the author/funder. All rights reserved. No reuse allowed without permission.

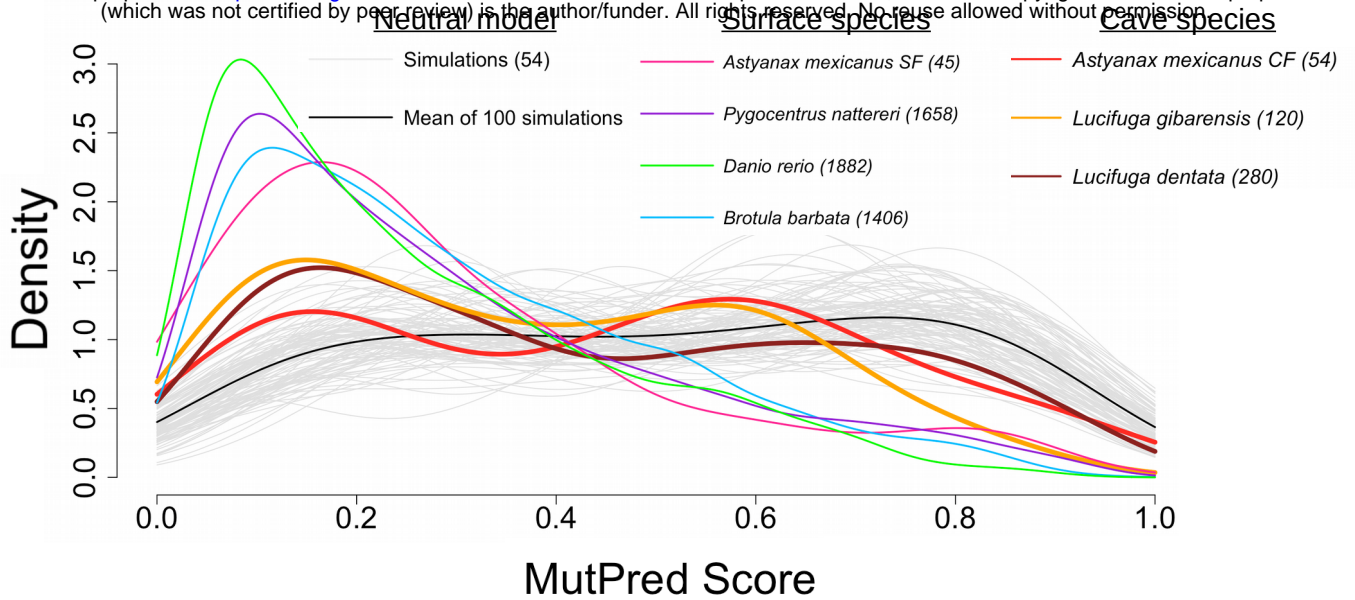

B

## Circadian clock genes

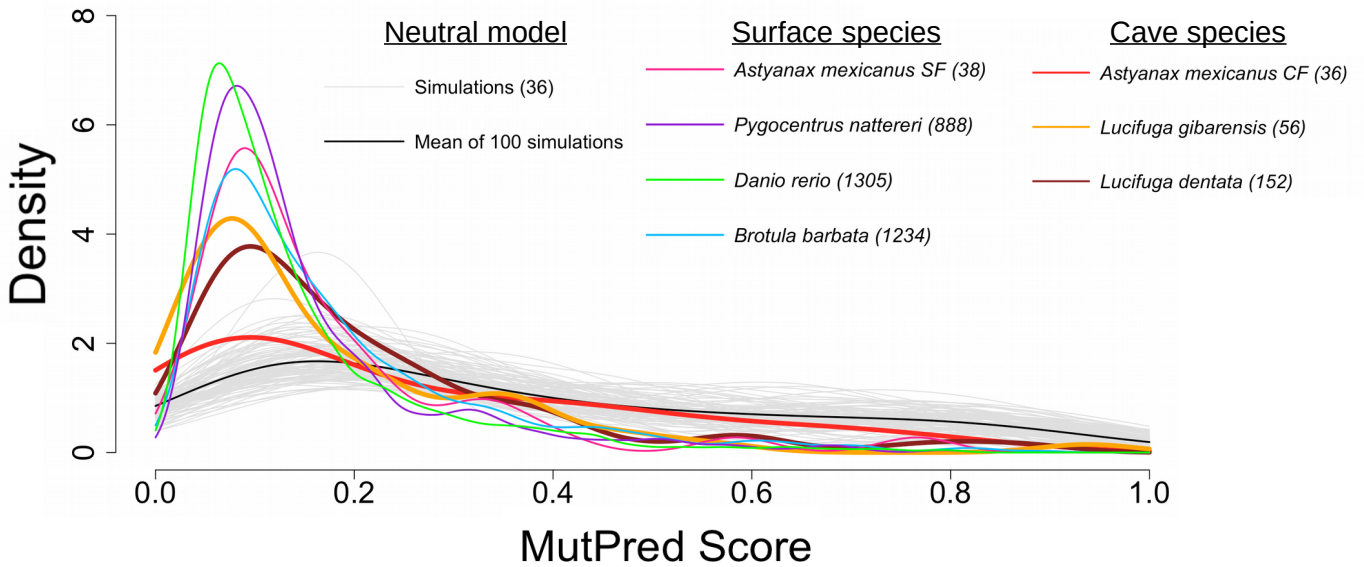

C

## Pigmentation genes

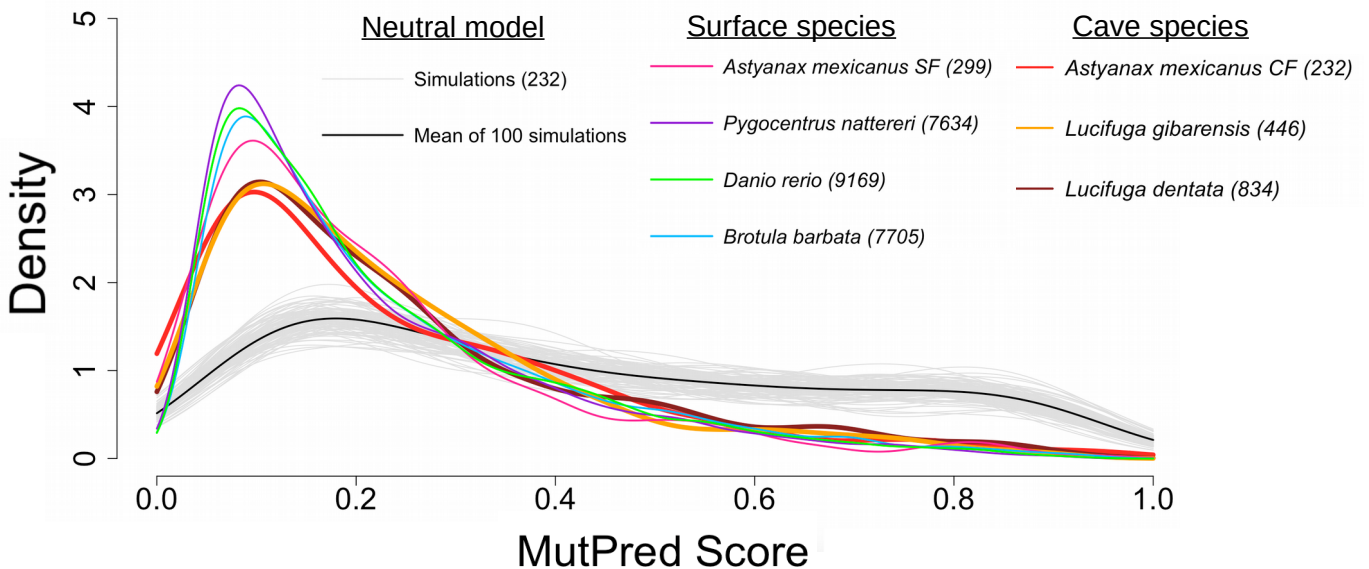

# Probability of 19 pseudogenes

bioRxiv preprint doi: <https://doi.org/10.1101/2020.03.05.978213>; this version posted March 6, 2020. The copyright holder for this preprint (which was not certified by peer review) is the author/funder. All rights reserved. No reuse allowed without permission.

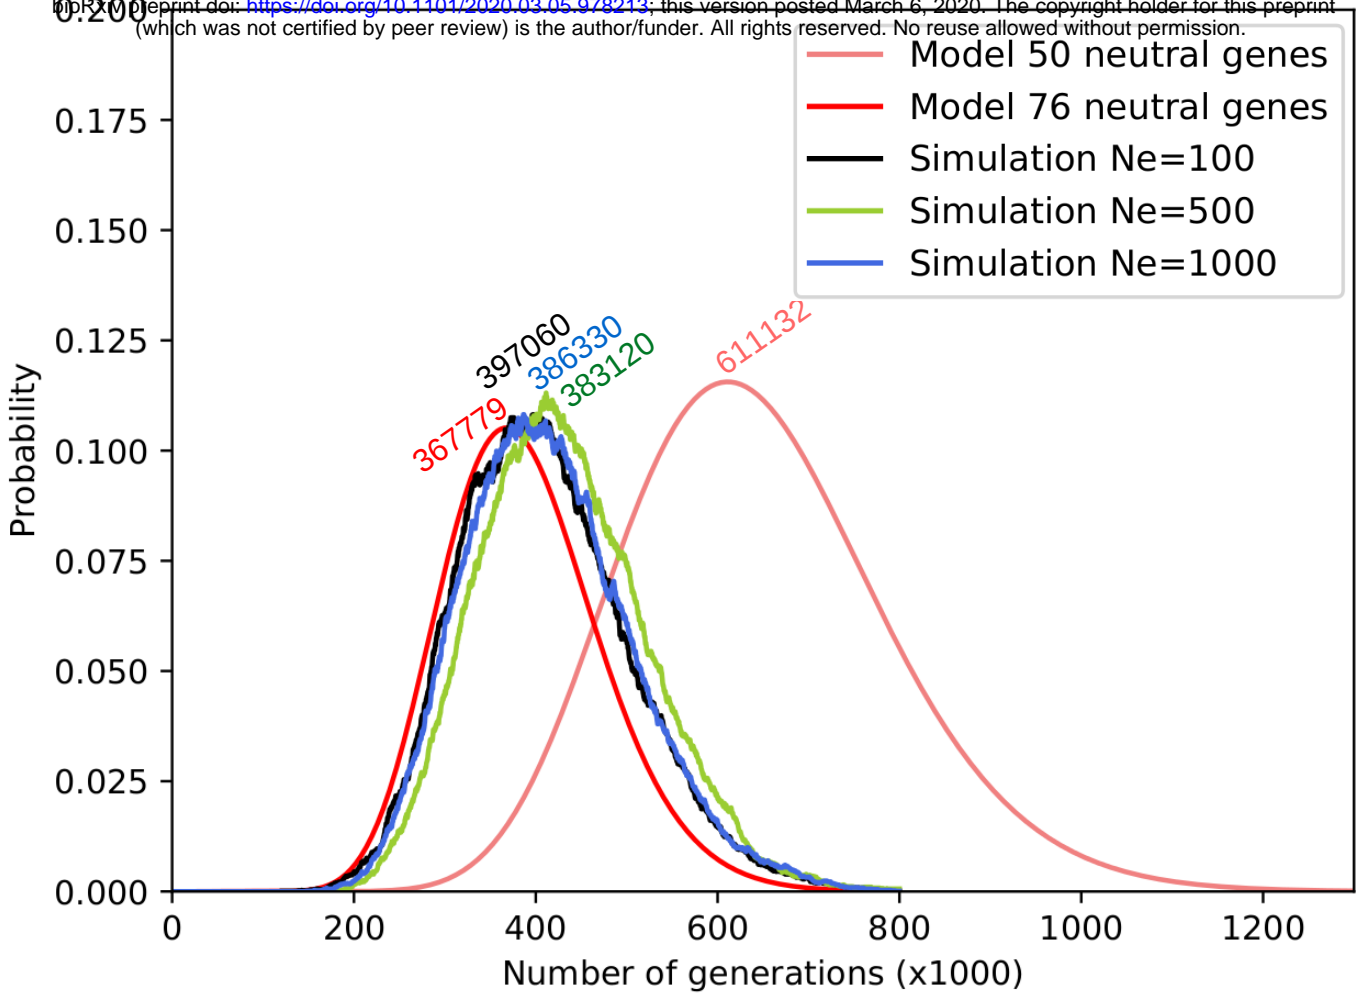

# A Pseudogenes in cavefishes and fossorial mammals eye genes

bioRxiv preprint doi: <https://doi.org/10.1101/2020.03.05.978213>; this version posted March 6, 2020. The copyright holder for this preprint (which was not certified by peer review) is the author/funder. All rights reserved. No reuse allowed without permission.

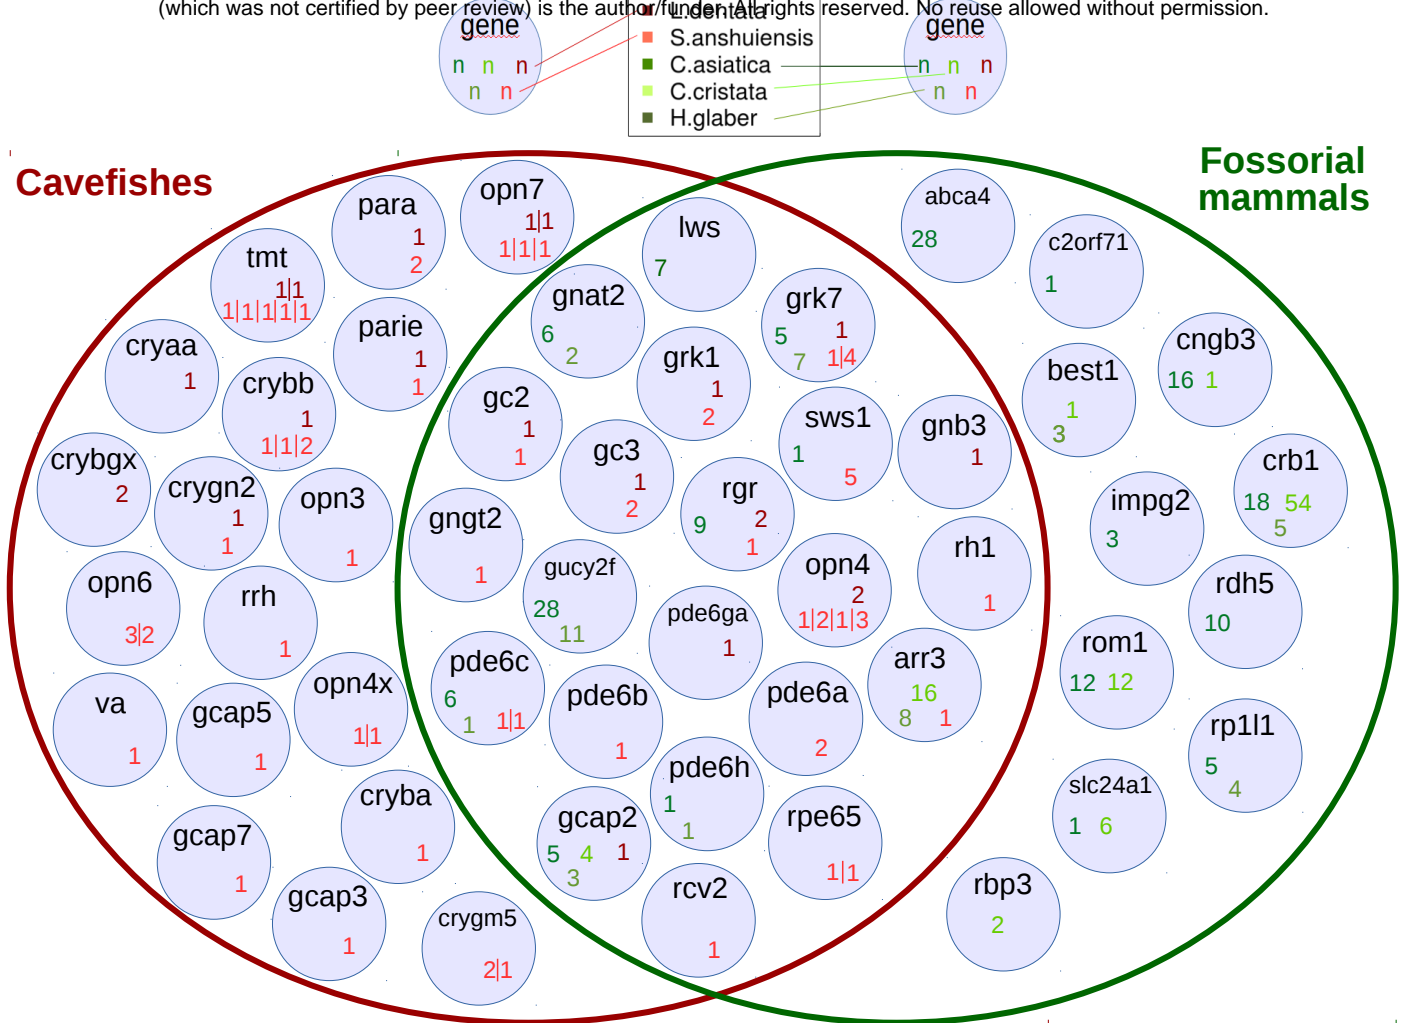

# B Distribution of LoF mutations in fossorial mammals and cavefish pseudogenes

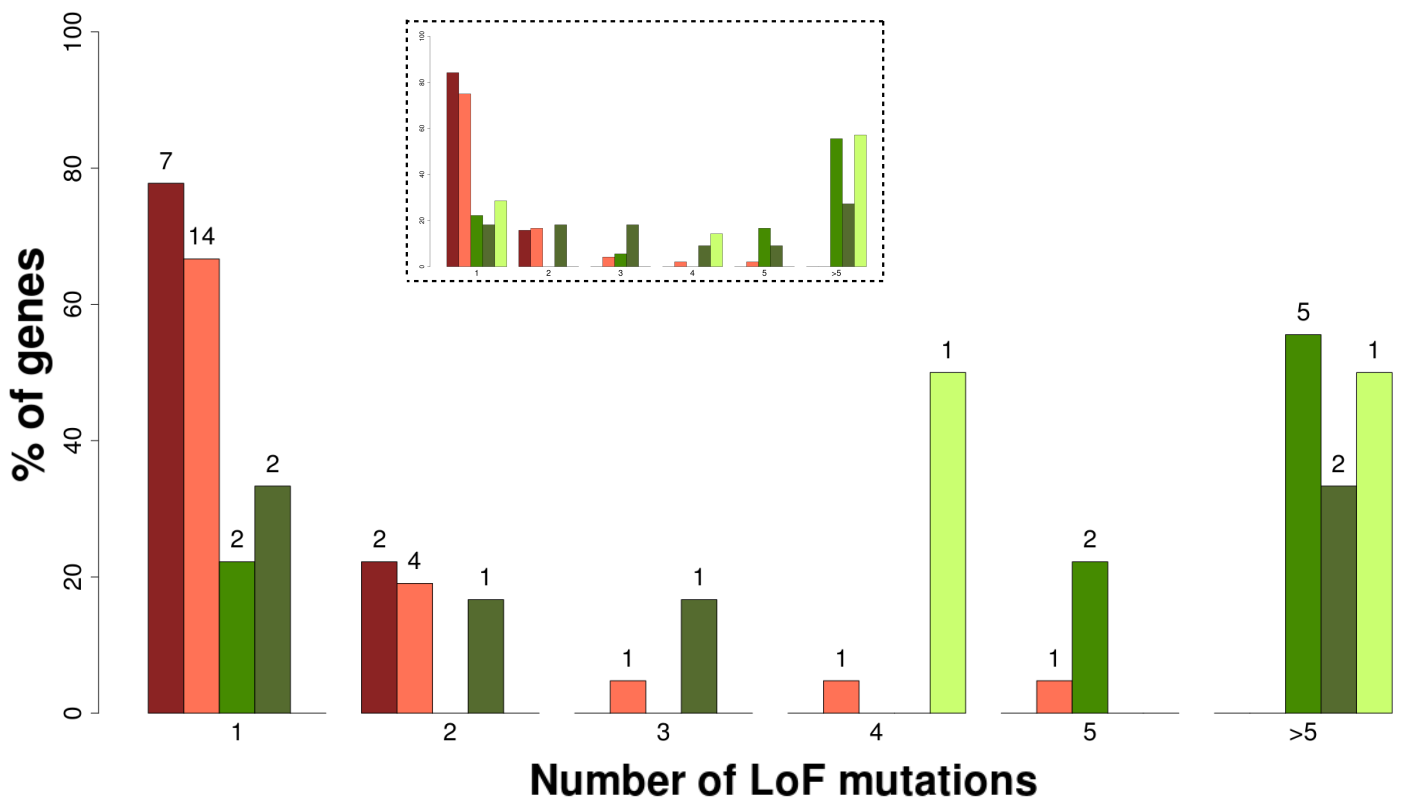

Source: https://www.biorxiv.org/content/10.1101/2020.03.05.978213v1.full.pdf
